# Supplementary material for: 2-Amino-1,3-benzothiazole: Endo N-Alkylation with α-Iodo Methyl Ketones Followed by Cyclization
Source: MDPI journal article supplement (doi:10.3390/molecules28052093), 2023-02-23

## 2-Amino-1,3-Benzothiazole: Endo *N*-Alkylation with $\alpha$ -Iodo Methyl Ketones Followed by Cyclization

Ivan A. Dorofeev, Larisa V. Zhilitskaya, Nina O. Yarosh and Bagrat A. Shainyan \*

A. E. Favorsky Irkutsk Institute of Chemistry, Siberian Division of the Russian Academy of Sciences, 1 Favorsky Street, 664033 Irkutsk, Russia

\* Correspondence: bagrat@irioch.irk.ru

Figure S1.  $^1\text{H}$  NMR spectrum of compound (3a).

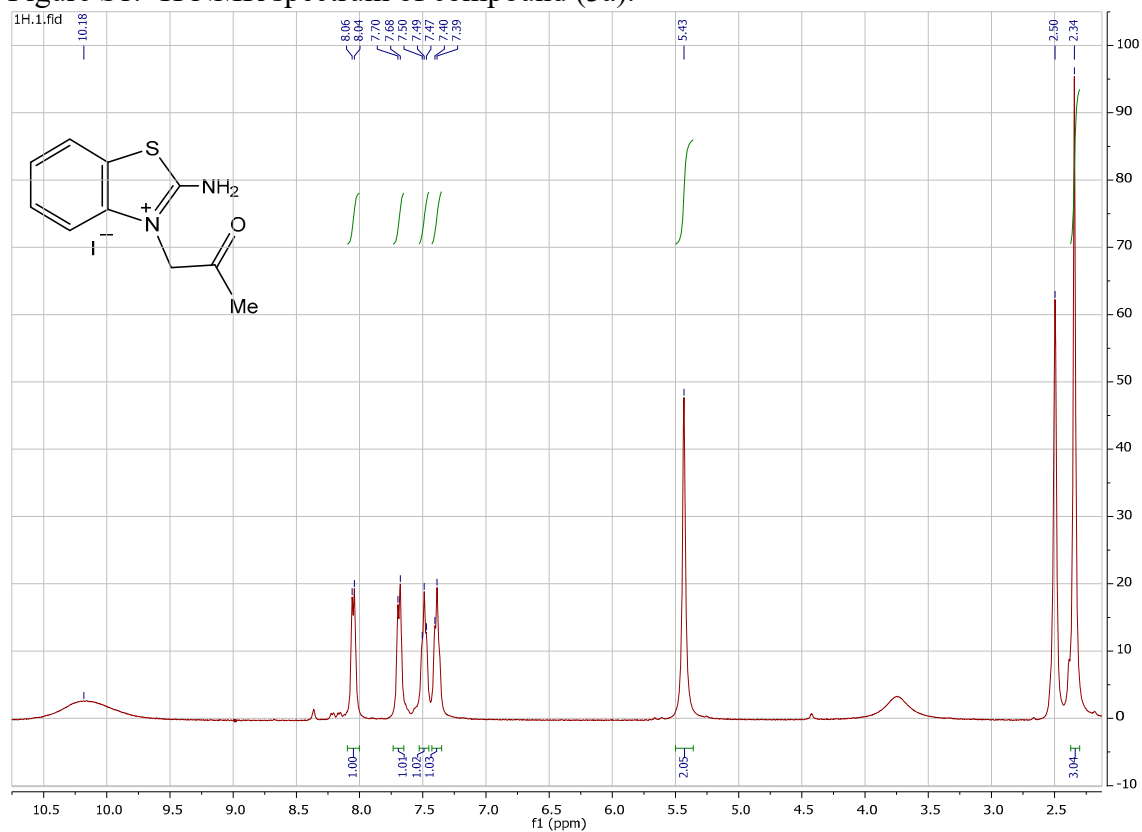

Figure S2.  $^{13}\text{C}$  NMR spectrum of compound (3a).

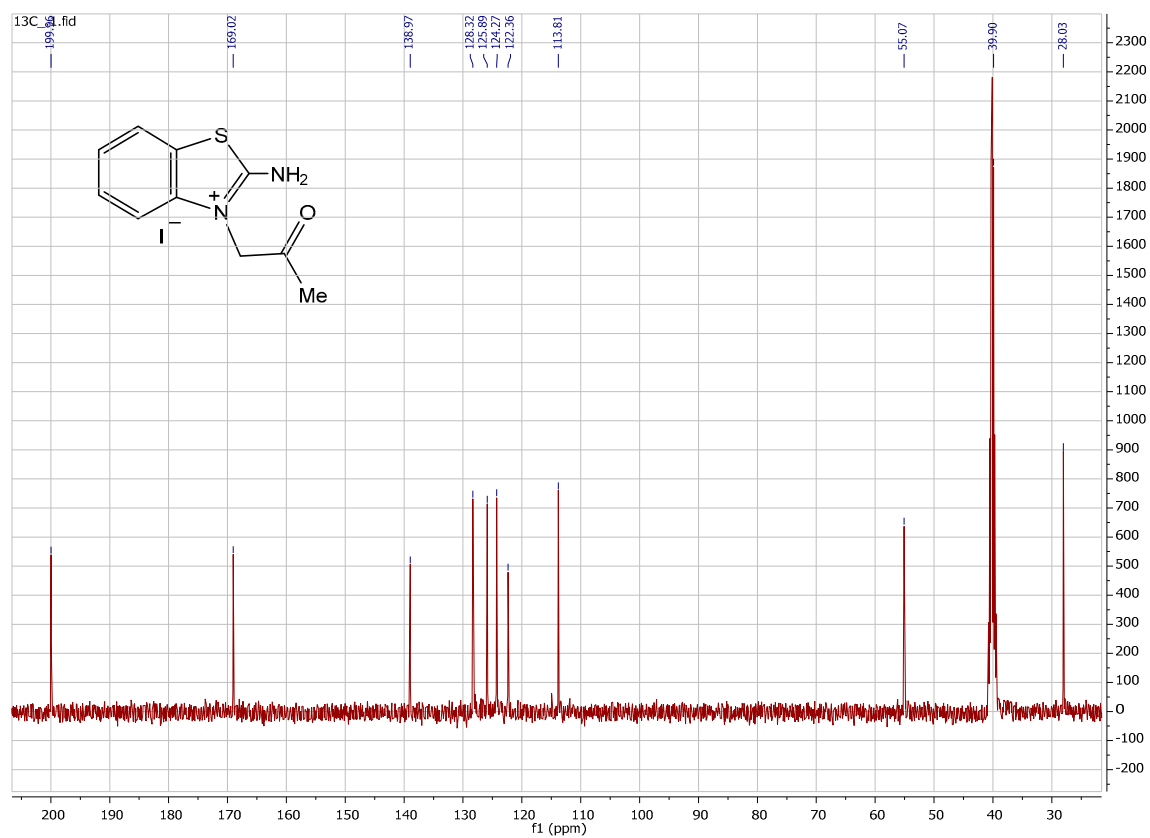

Figure S3. <sup>1</sup>H NMR spectrum of compound (3b).

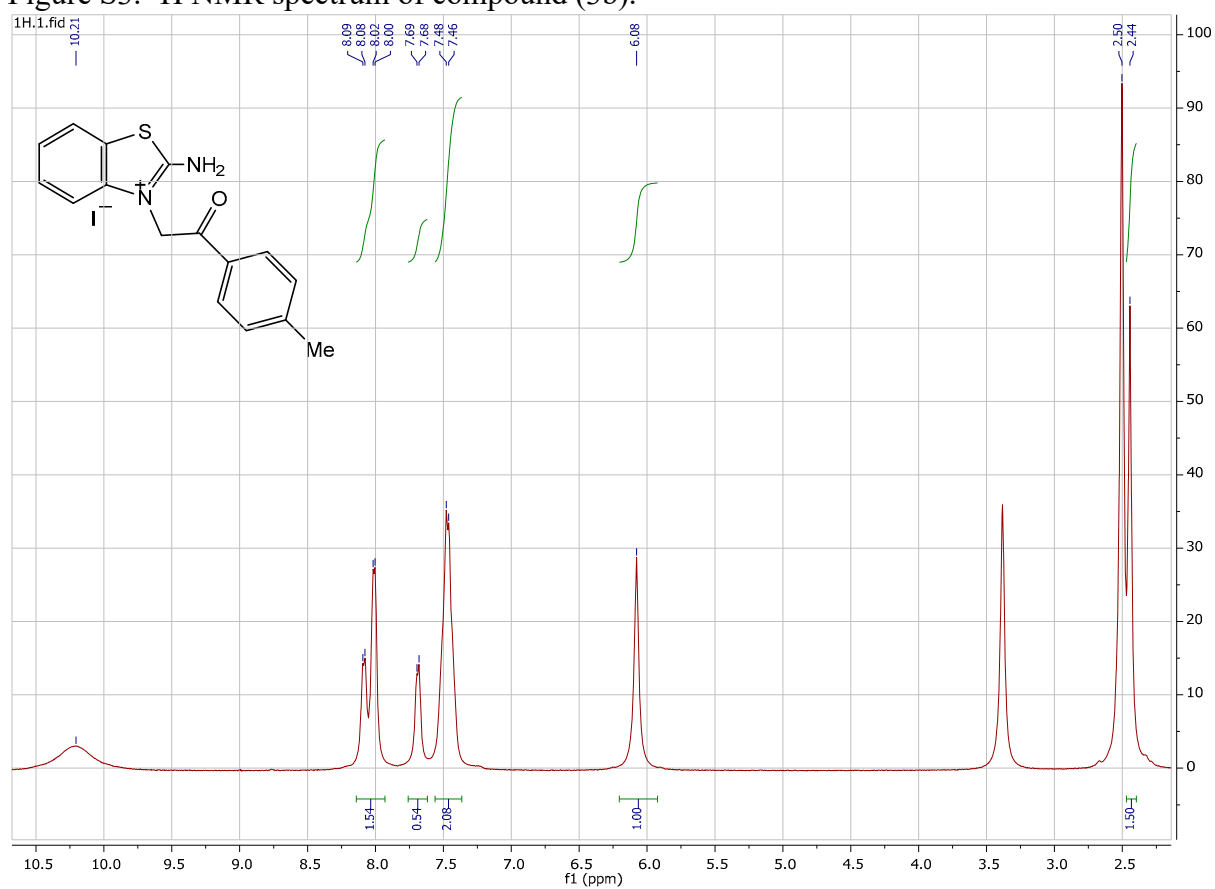

Figure S4. <sup>13</sup>C NMR spectrum of compound (3b).

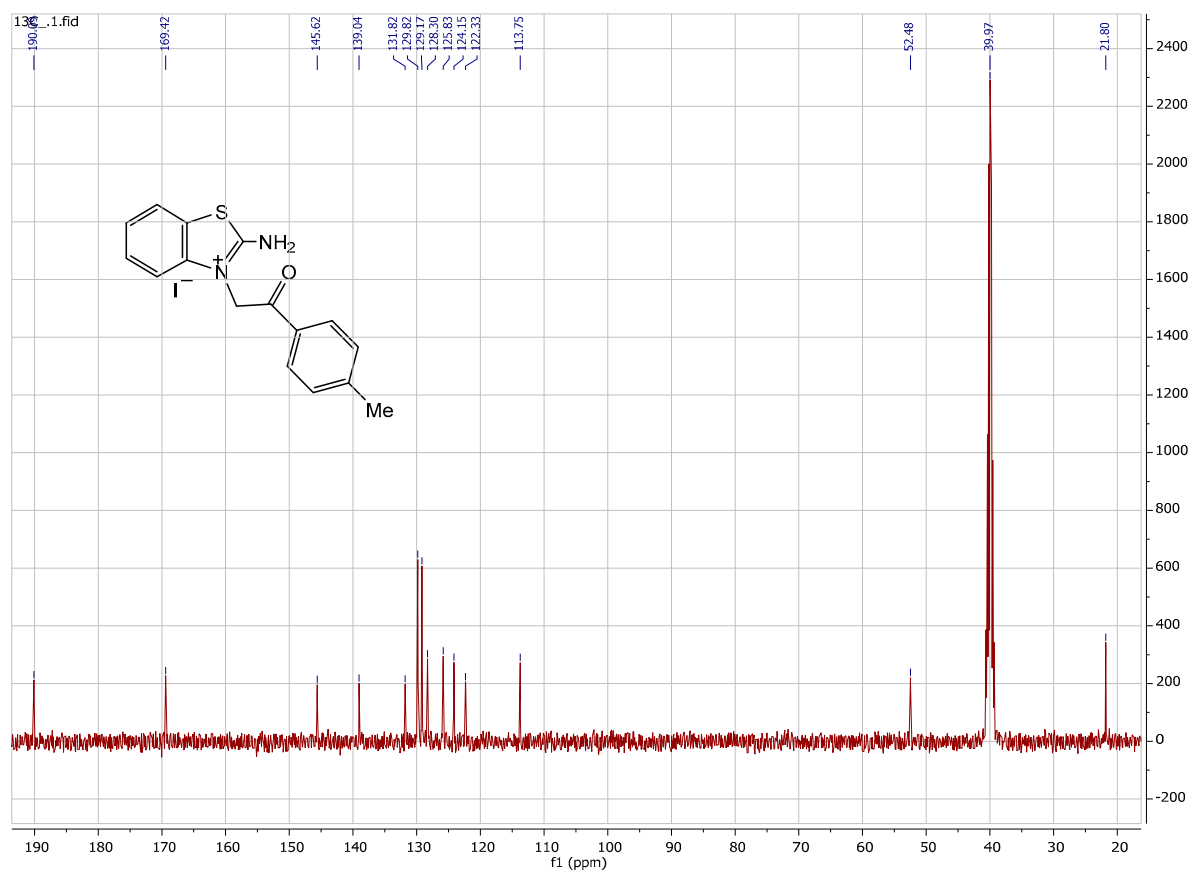

Figure S5. <sup>1</sup>H NMR spectrum of compound (3c).

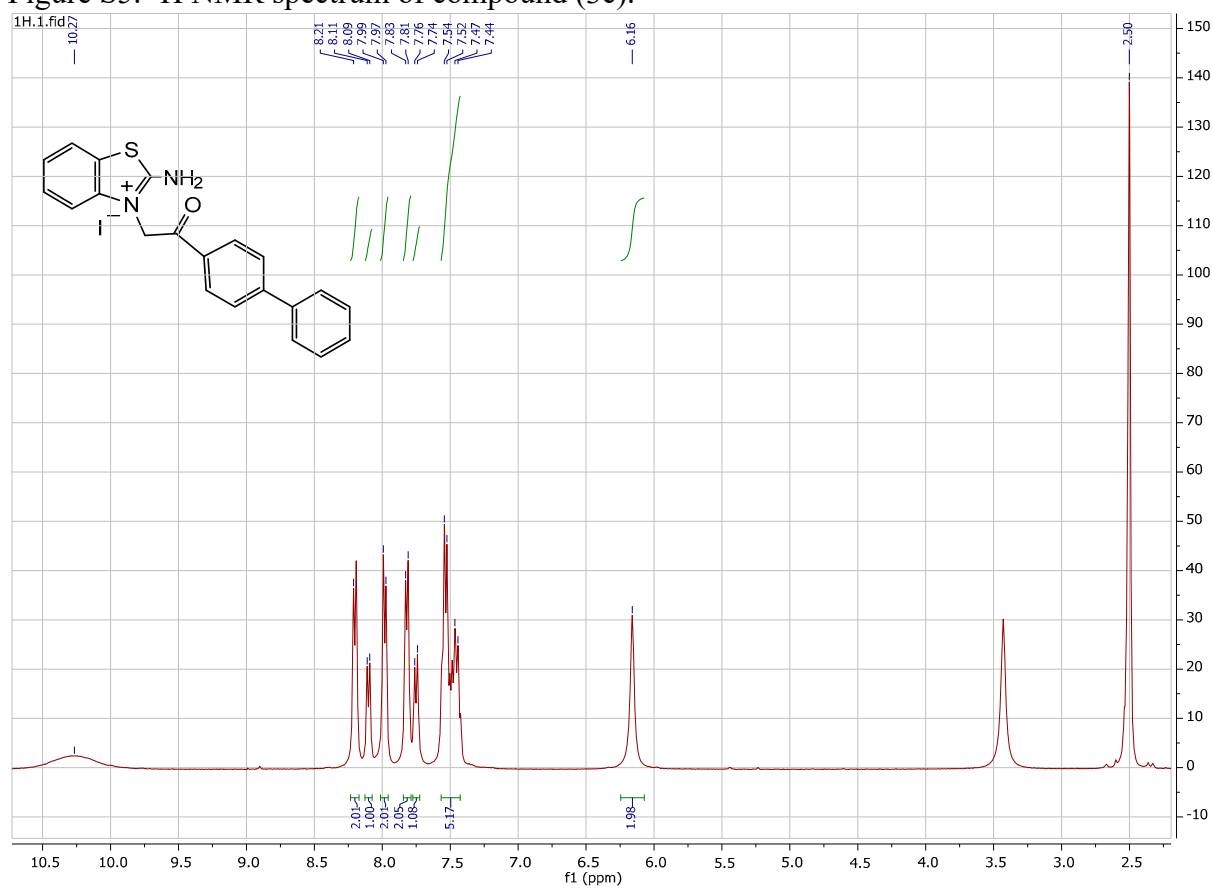

Figure S6. <sup>13</sup>C NMR spectrum of compound (3c).

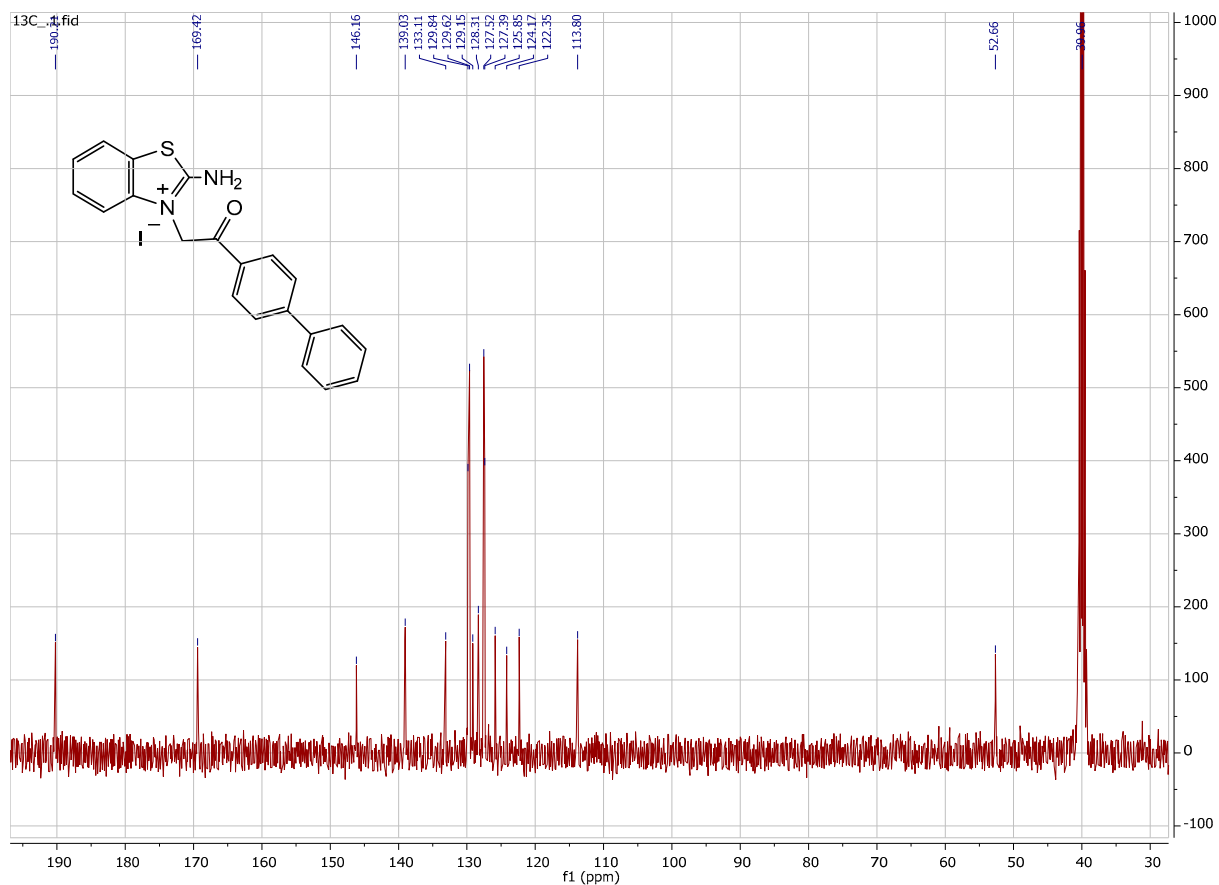

Figure S7. <sup>1</sup>H NMR spectrum of compound (3d).

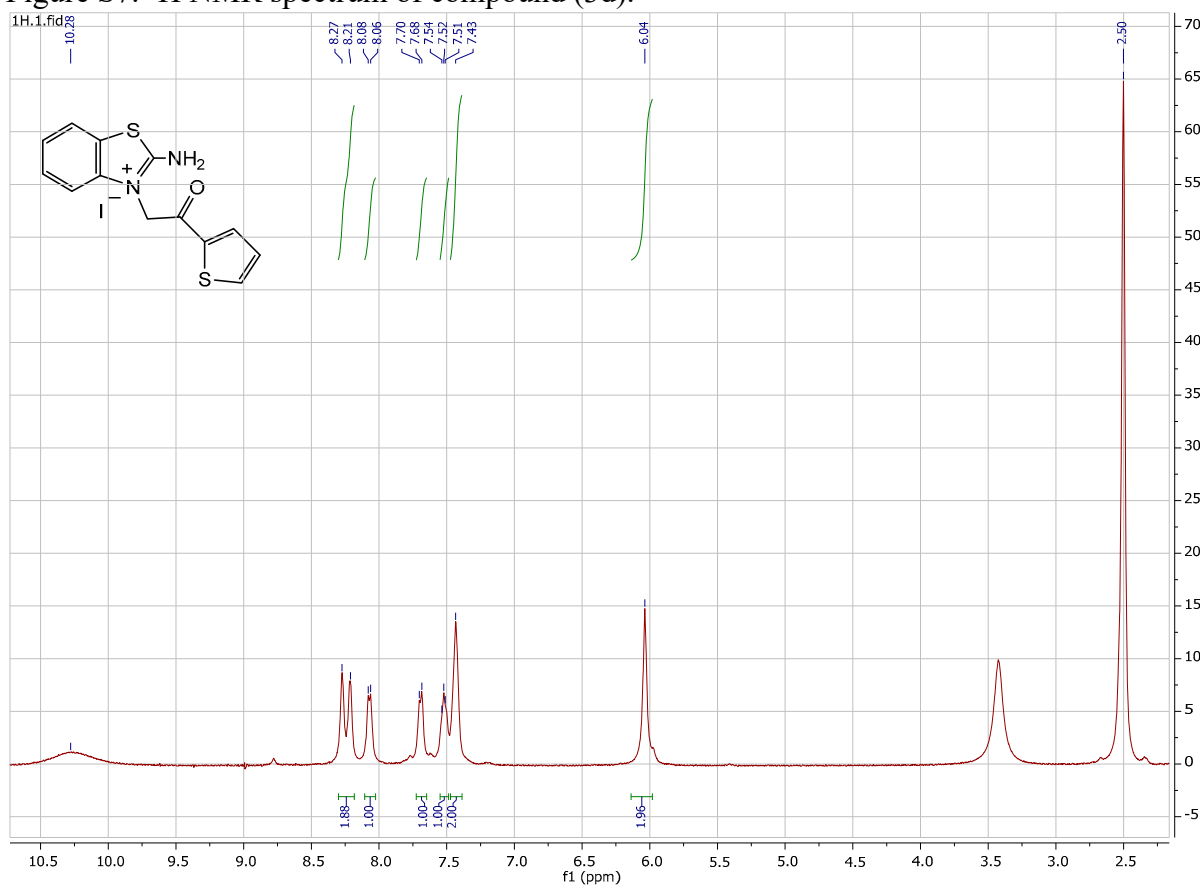

Figure S8. <sup>13</sup>C NMR spectrum of compound (3d).

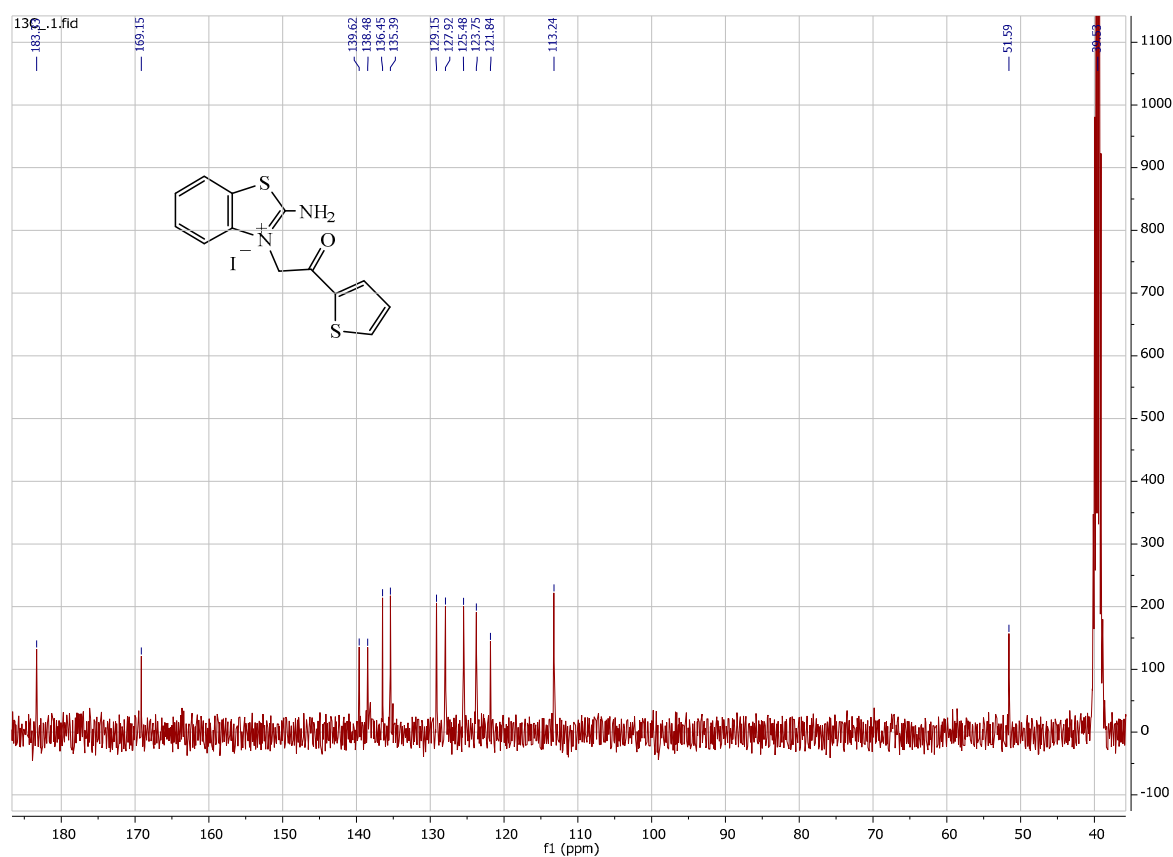

Figure S9. <sup>1</sup>H NMR spectrum of compound (3e).

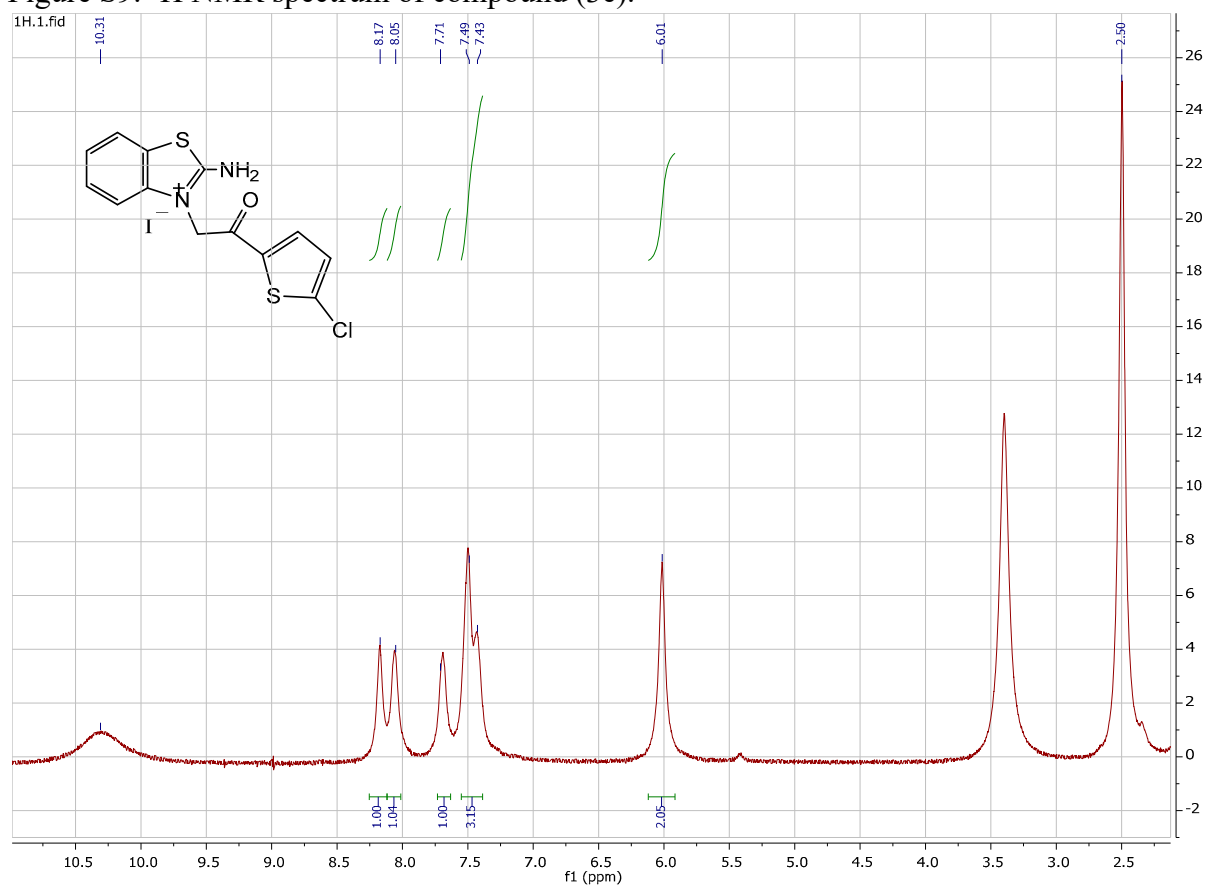

Figure S10. <sup>13</sup>C NMR spectrum of compound (3e).

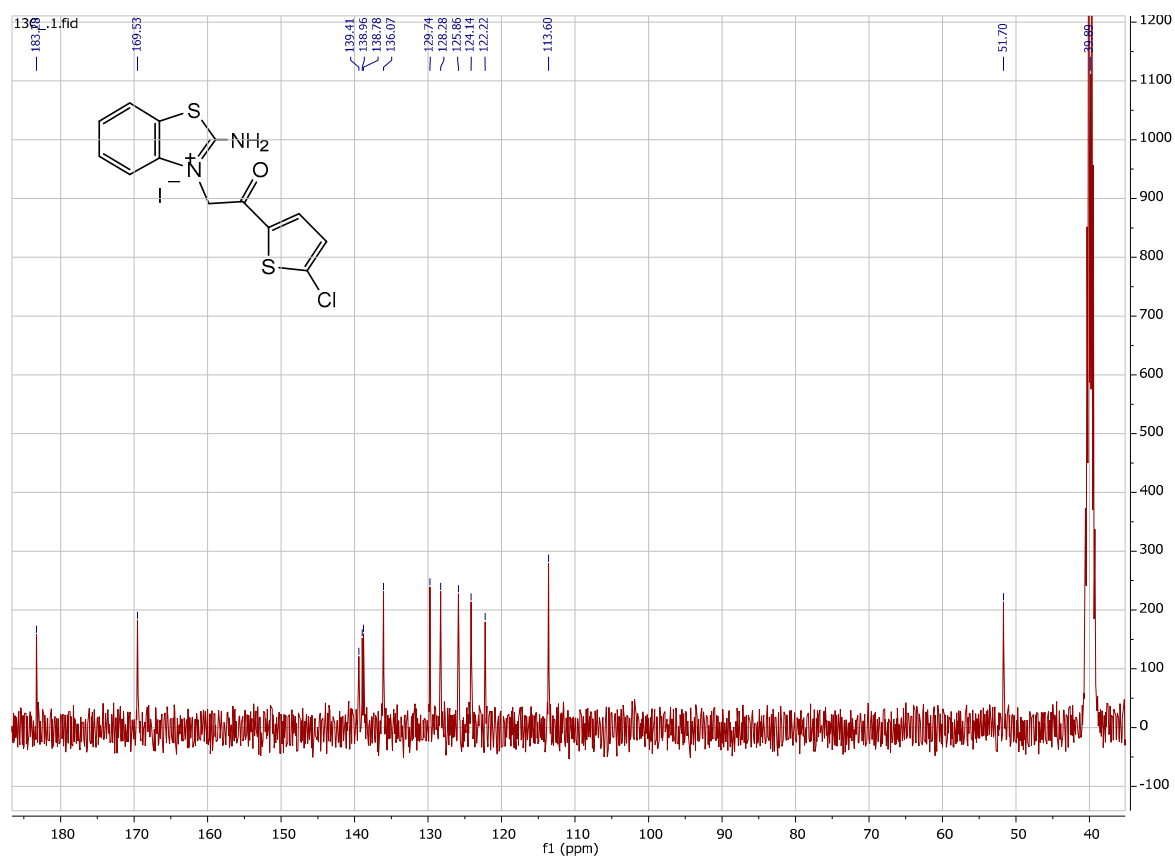

Figure S11. <sup>1</sup>H NMR spectrum of compound (3f).

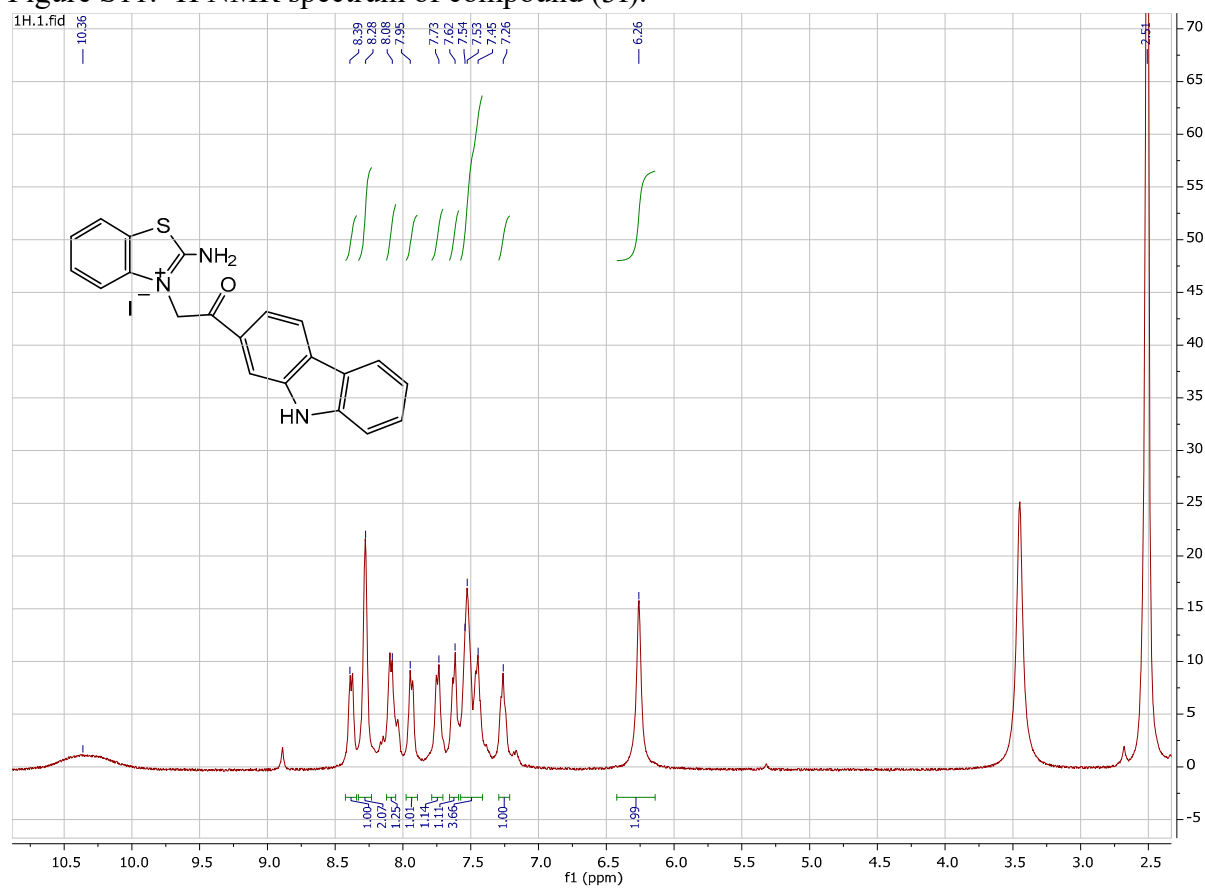

Figure S12. <sup>13</sup>C NMR spectrum of compound (3f).

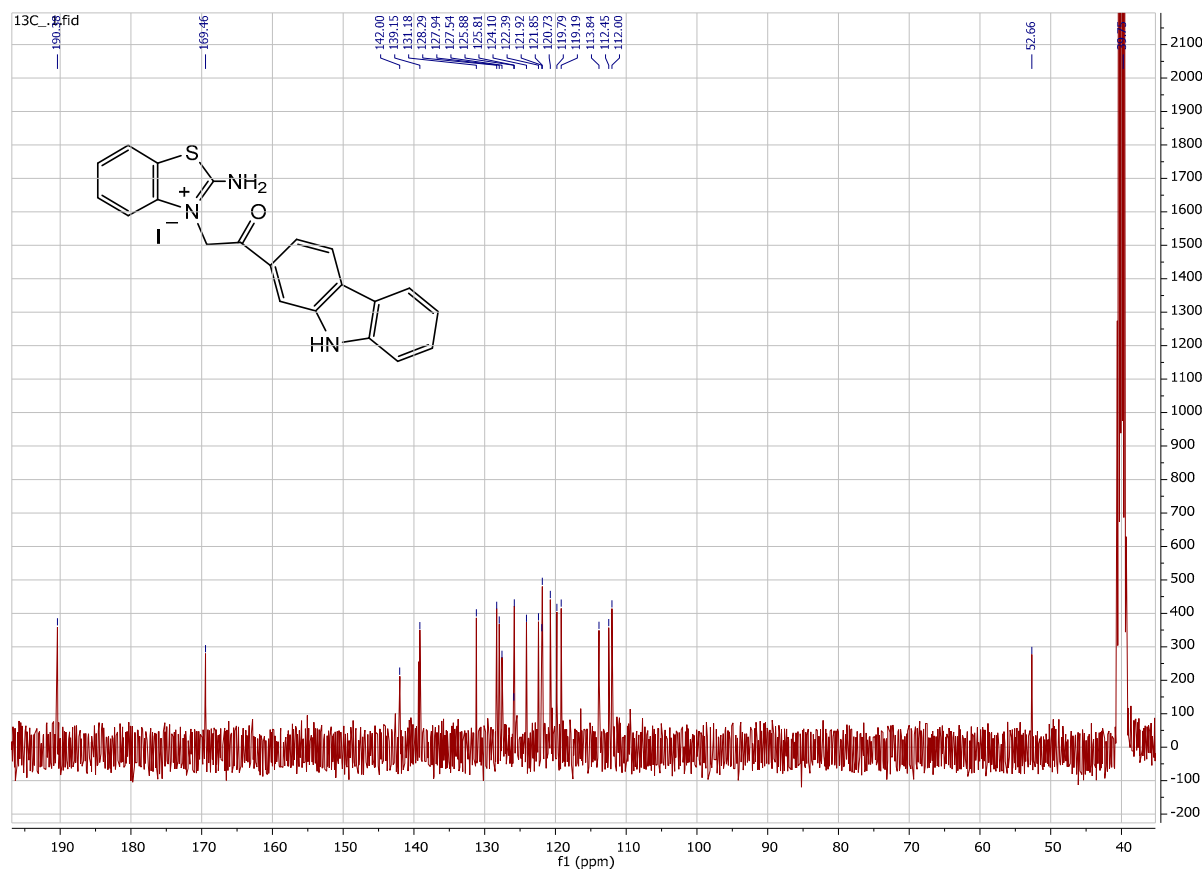

Figure S13. <sup>1</sup>H NMR spectrum of compound (6a).

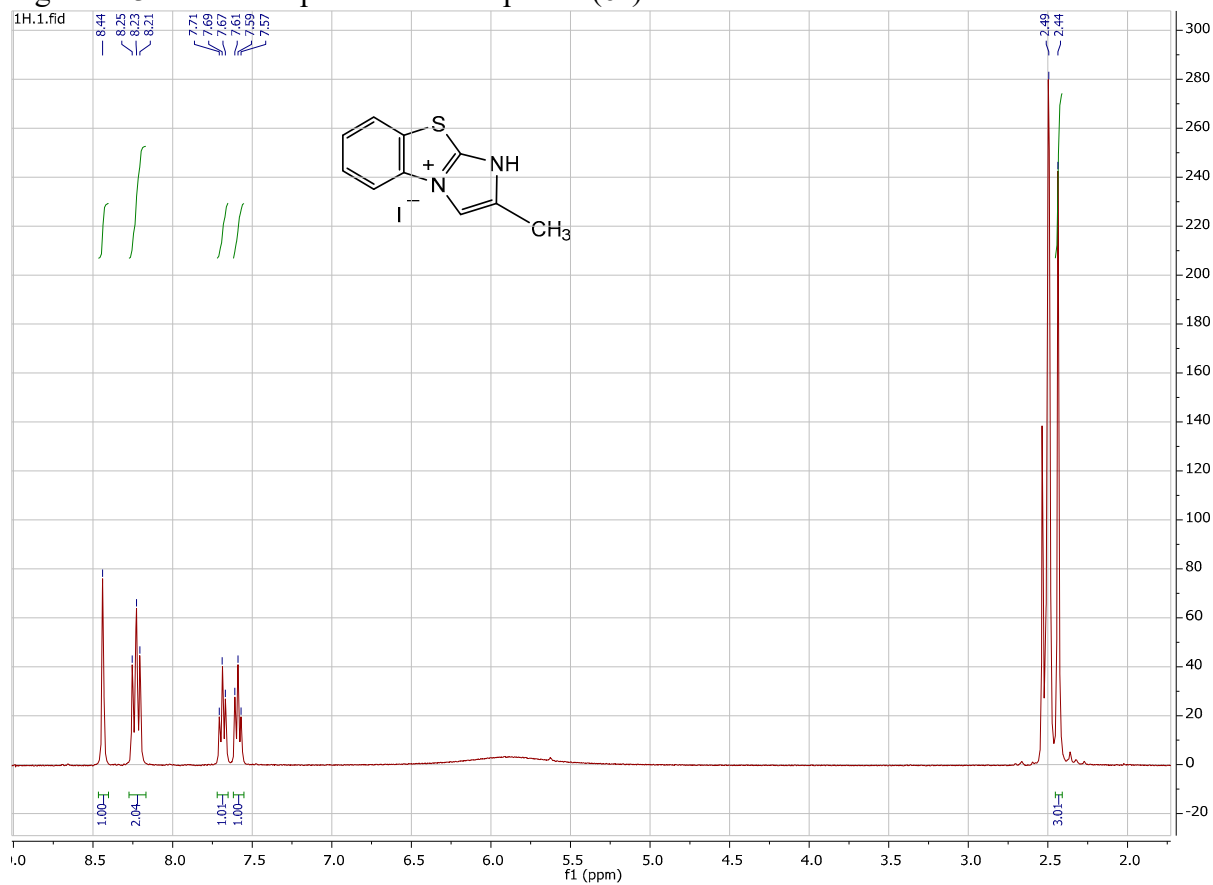

Figure S14. <sup>13</sup>C NMR spectrum of compound (6a).

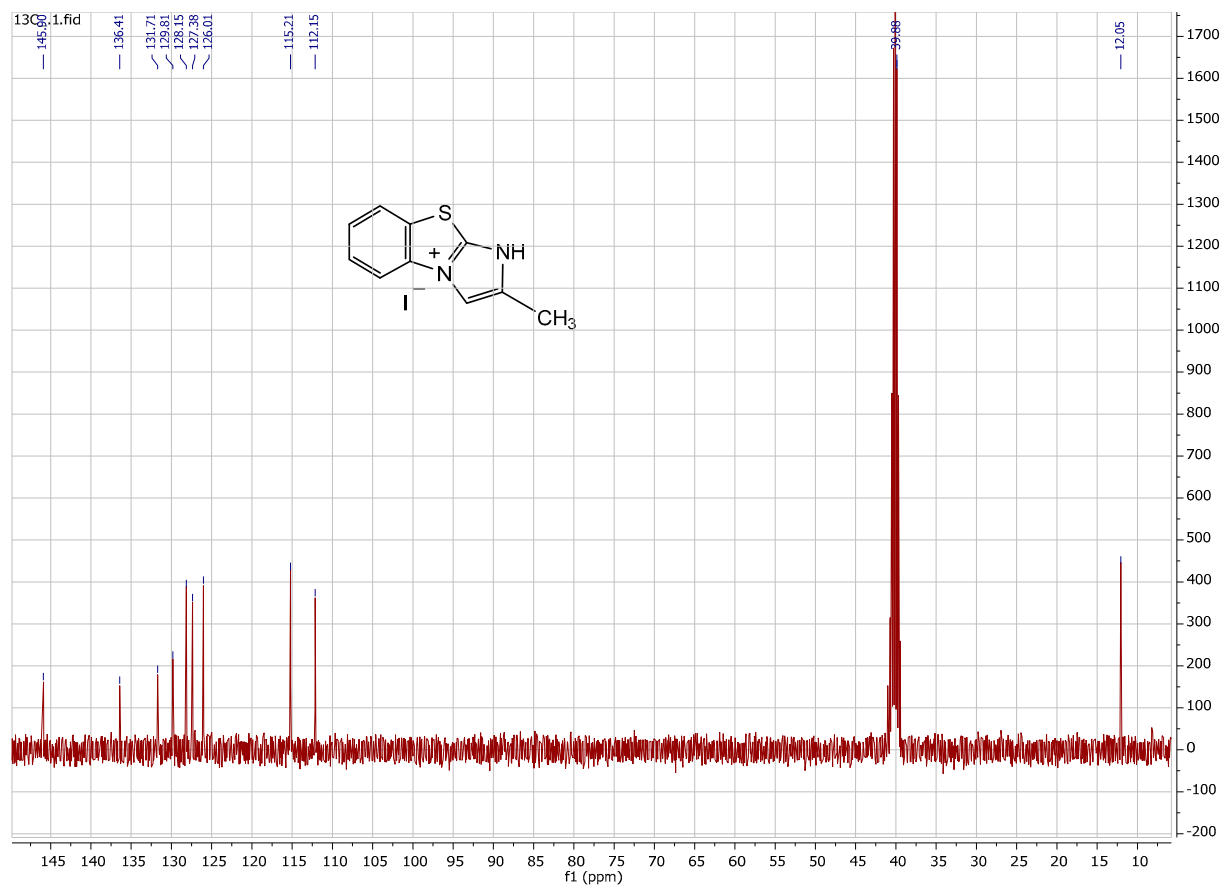

Figure S15. <sup>1</sup>H NMR spectrum of compound (6b).

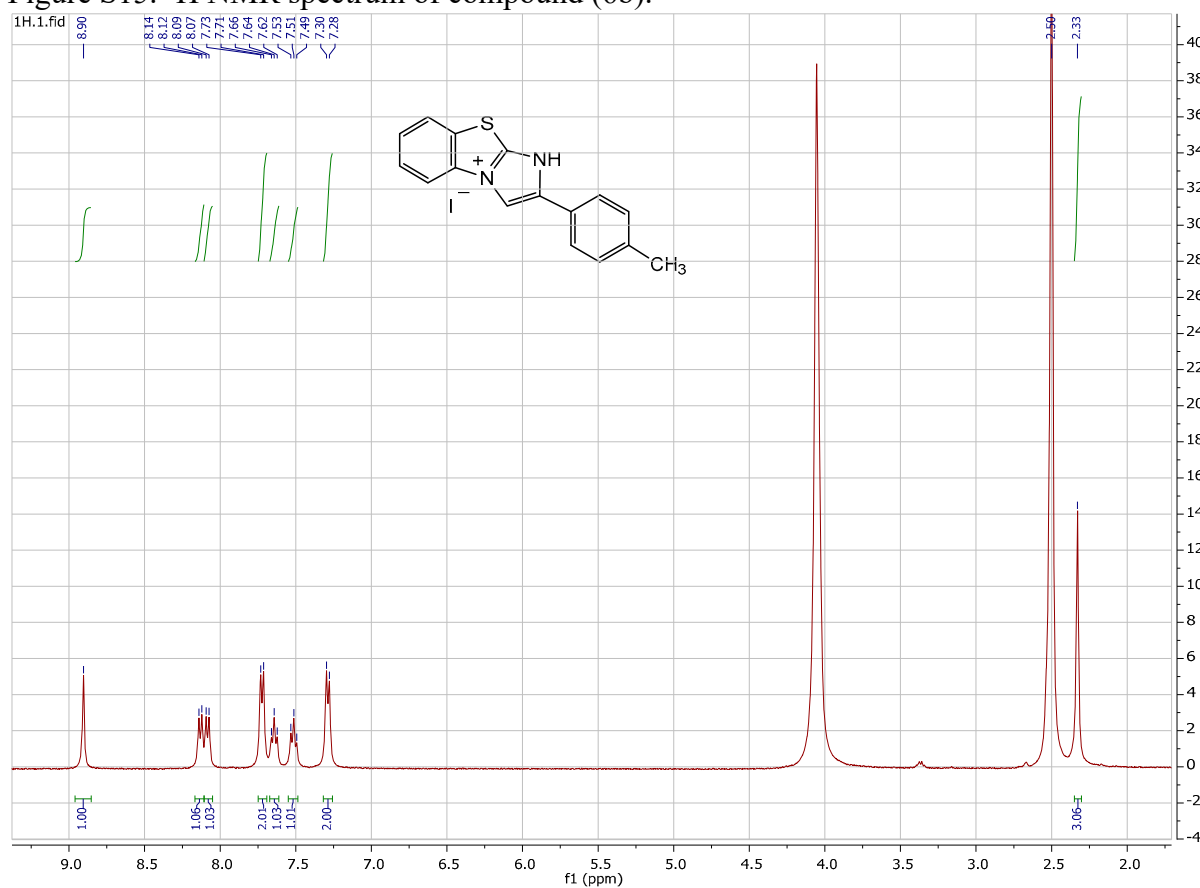

Figure S16.  $^{13}\text{C}$  NMR spectrum of compound (6b).

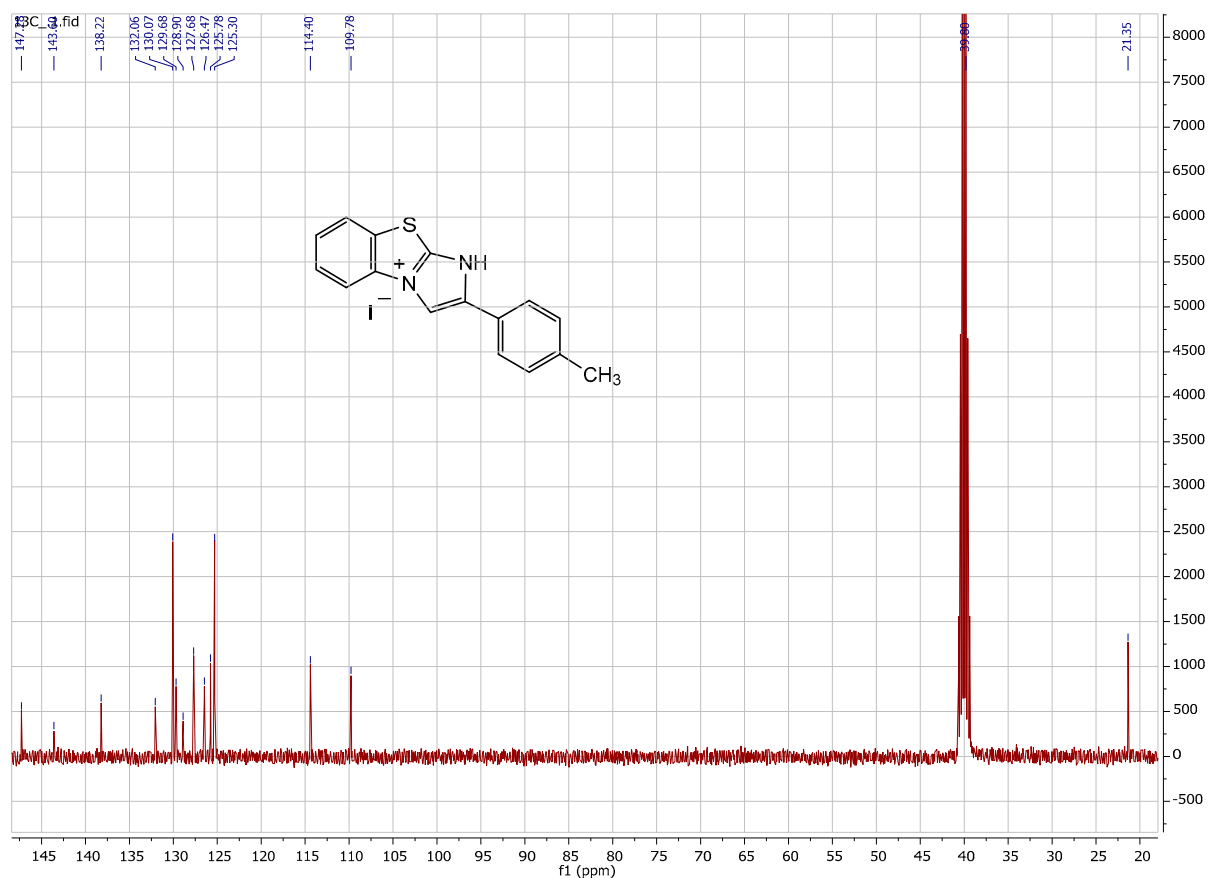

Figure S17.  $^1\text{H}$  NMR spectrum of compound (6c).

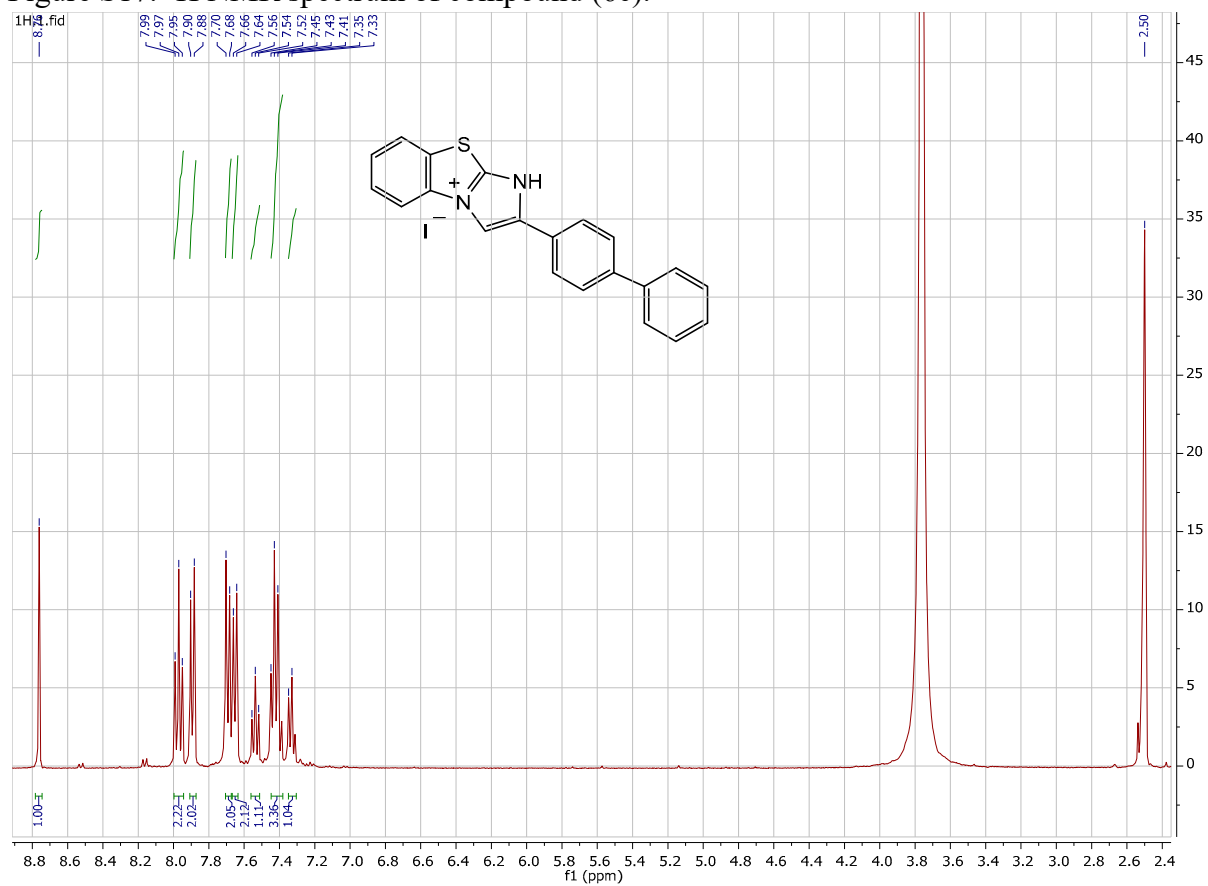

Figure S18.  $^{13}\text{C}$  NMR spectrum of compound (6c).

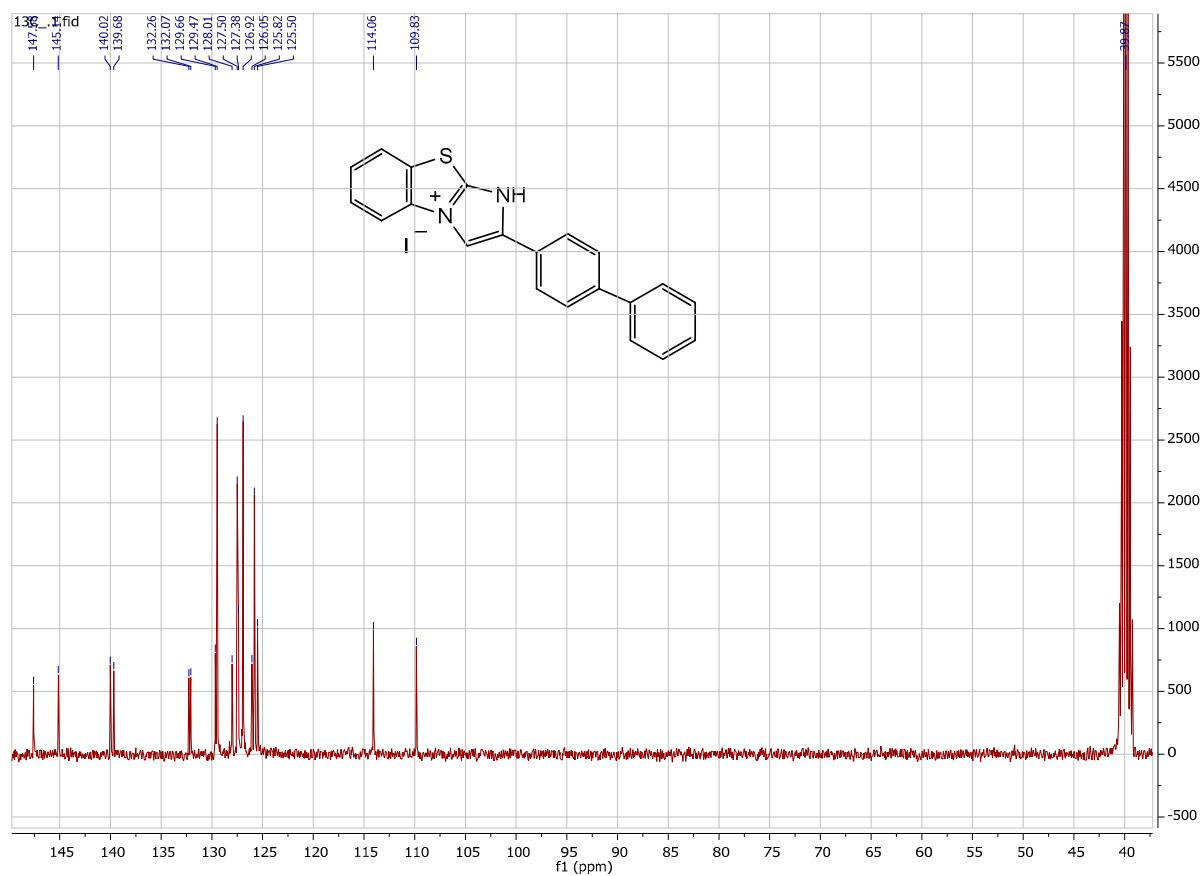

Figure S19.  $^1\text{H}$  NMR spectrum of compound (6d).

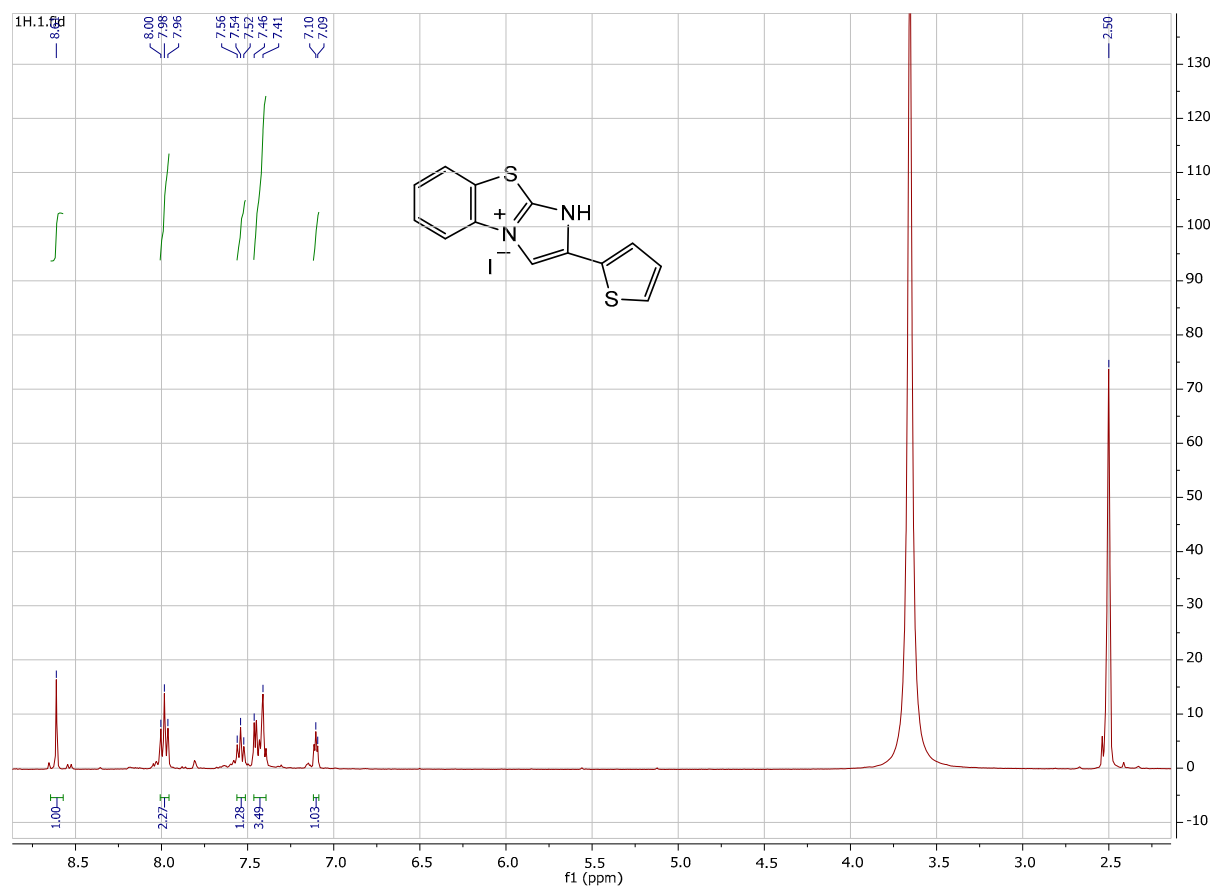

Figure S20.  $^{13}\text{C}$  NMR spectrum of compound (6d).

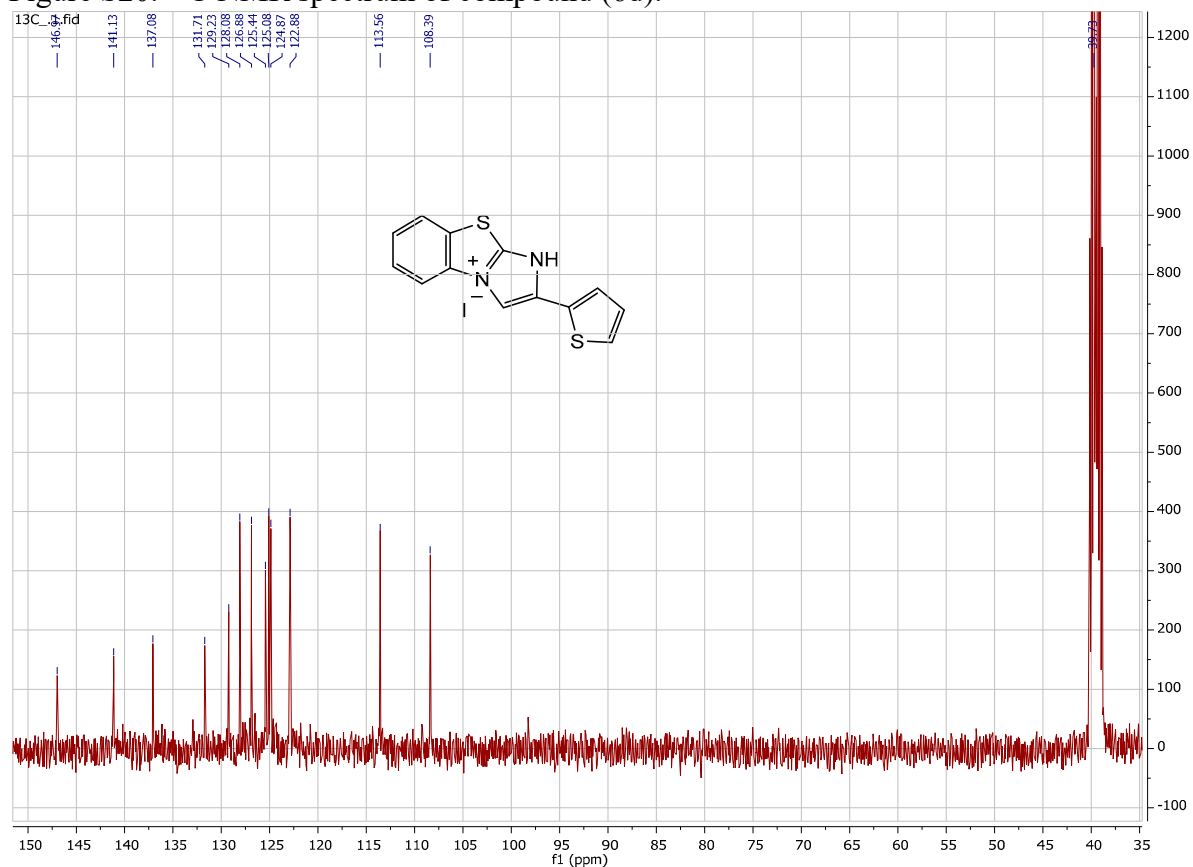

Figure S21.  $^1\text{H}$  NMR spectrum of compound (6e).

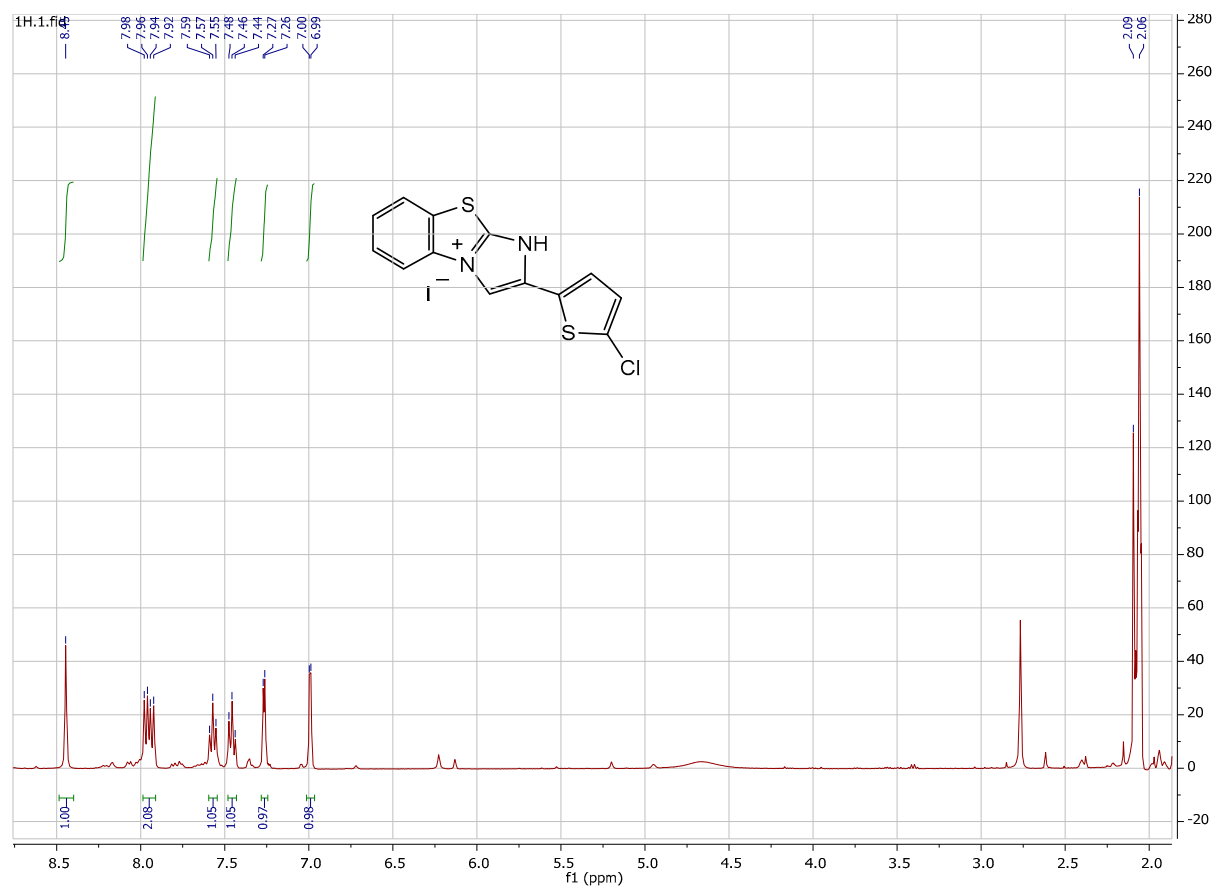

Figure S22.  $^{13}\text{C}$  NMR spectrum of compound (6e).

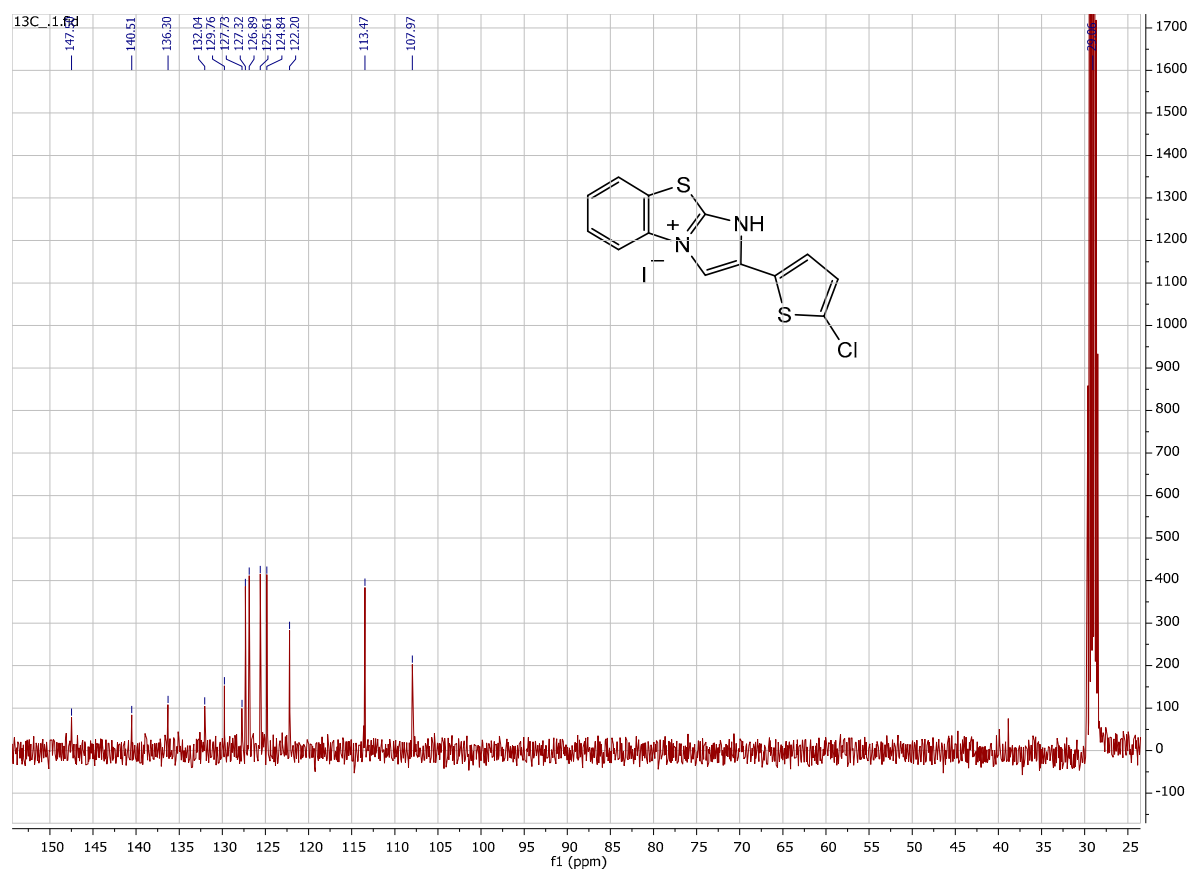

Figure S23.  $^1\text{H}$  NMR spectrum of compound (6f).

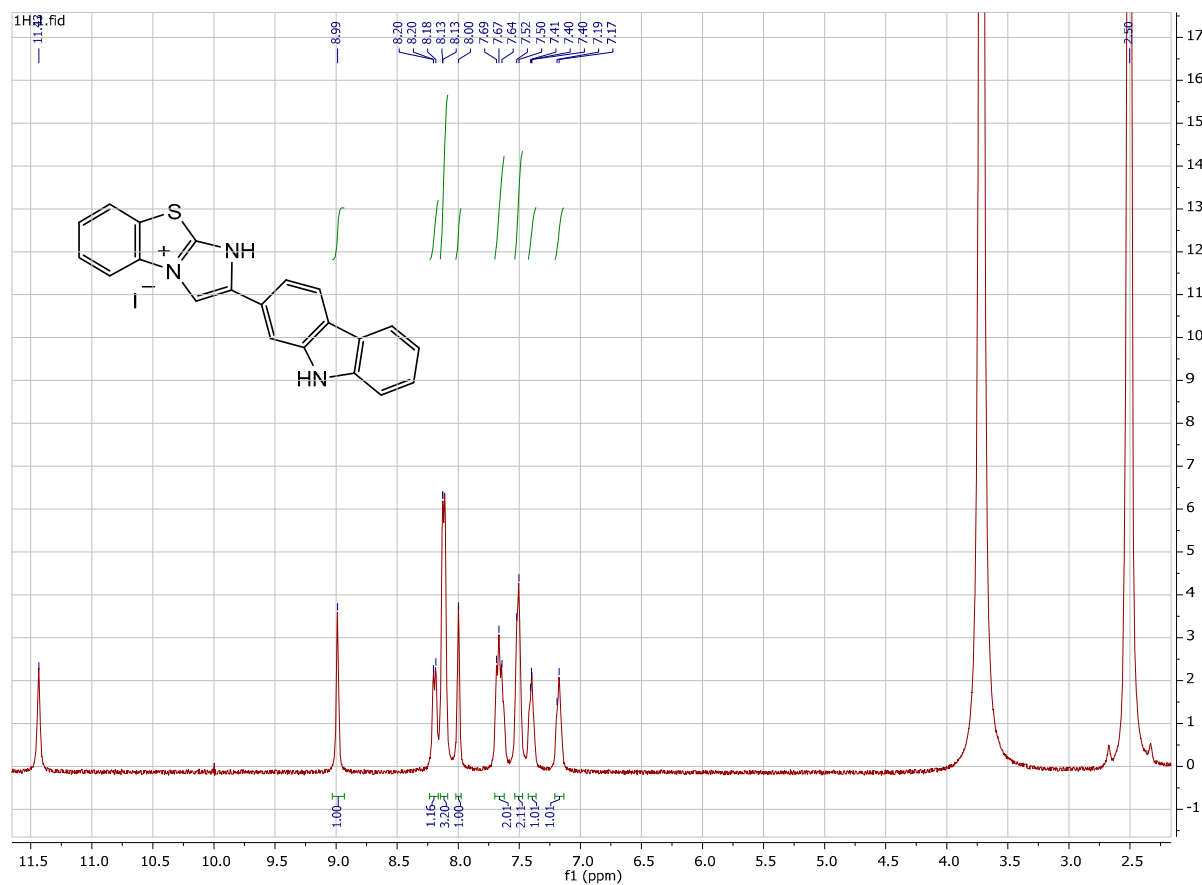

Figure S24.  $^{13}\text{C}$  NMR spectrum of compound (6f).

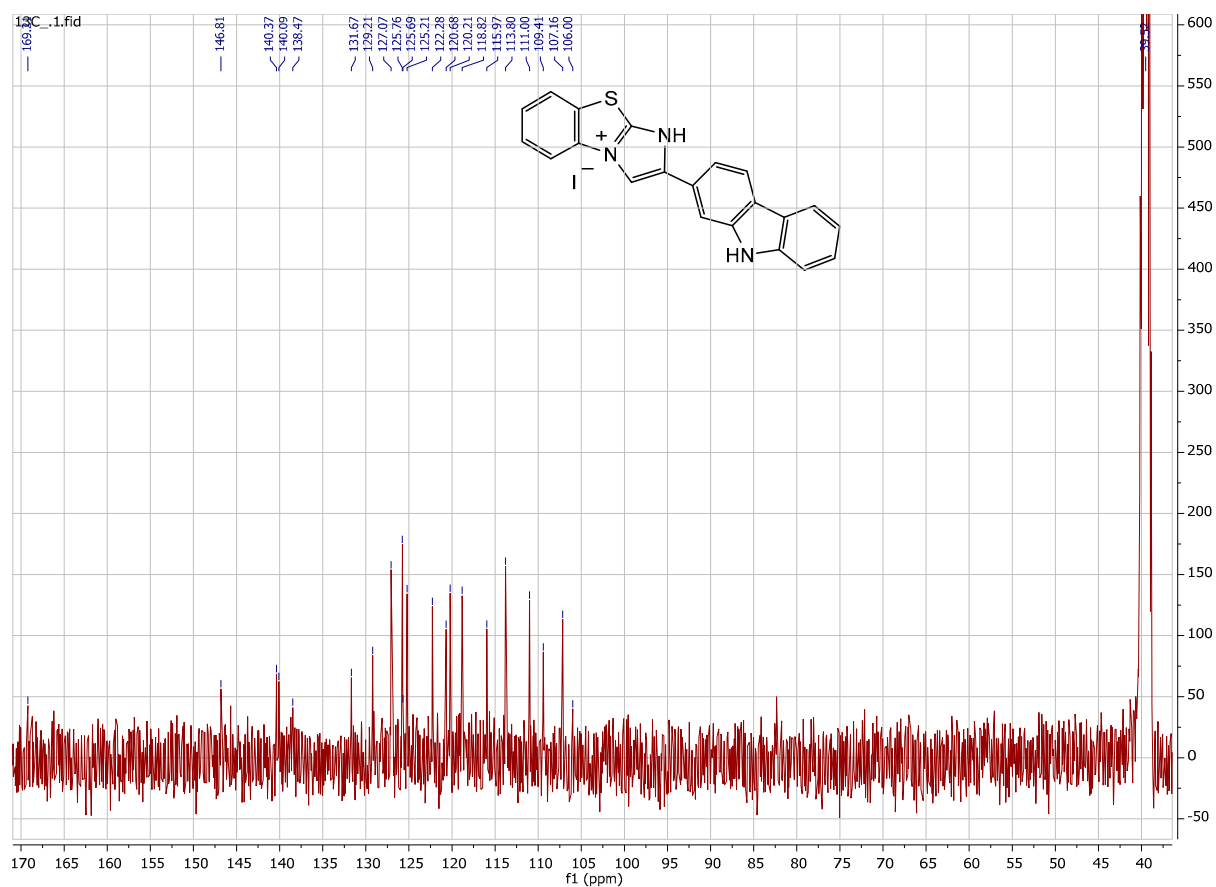

Figure S25. <sup>1</sup>H NMR spectrum of compound (4d).

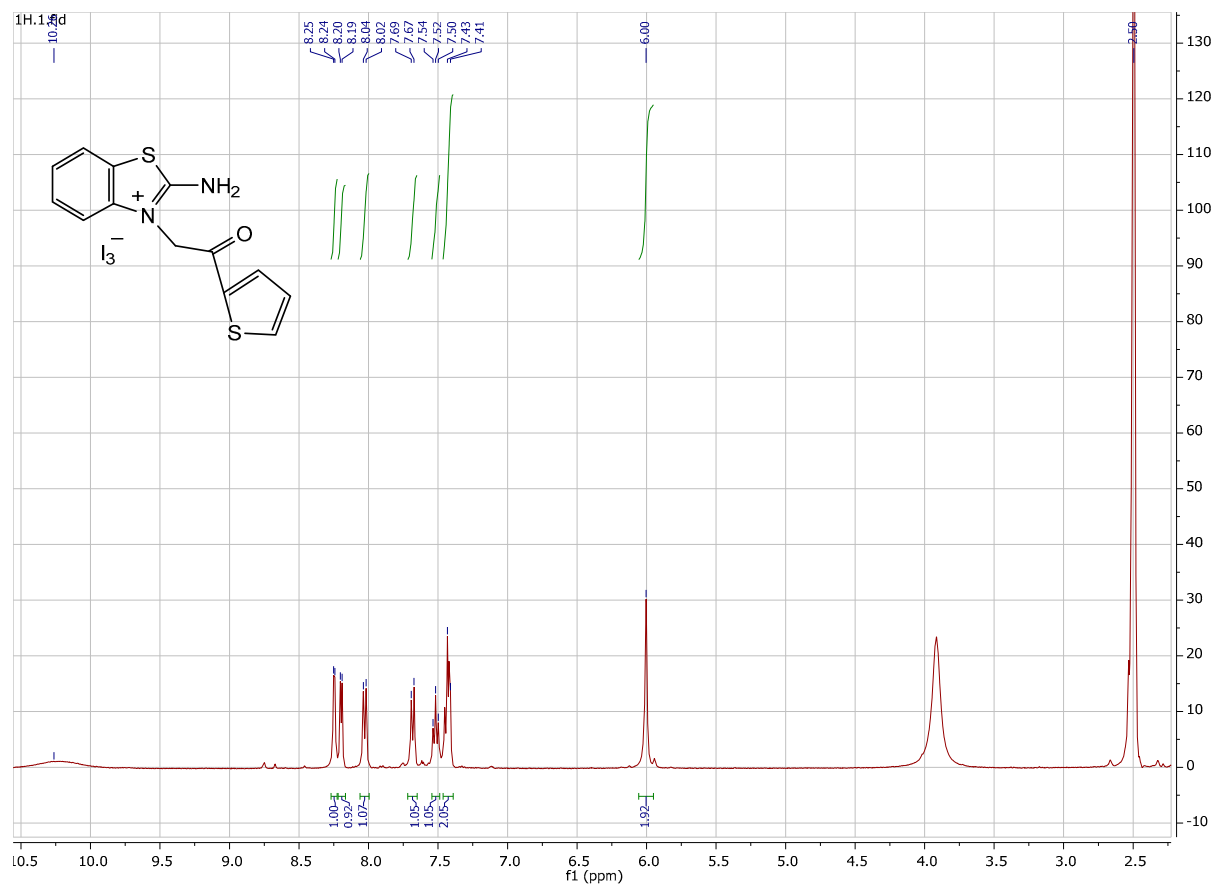

Figure S26.  $^{13}\text{C}$  NMR spectrum of compound (4d).

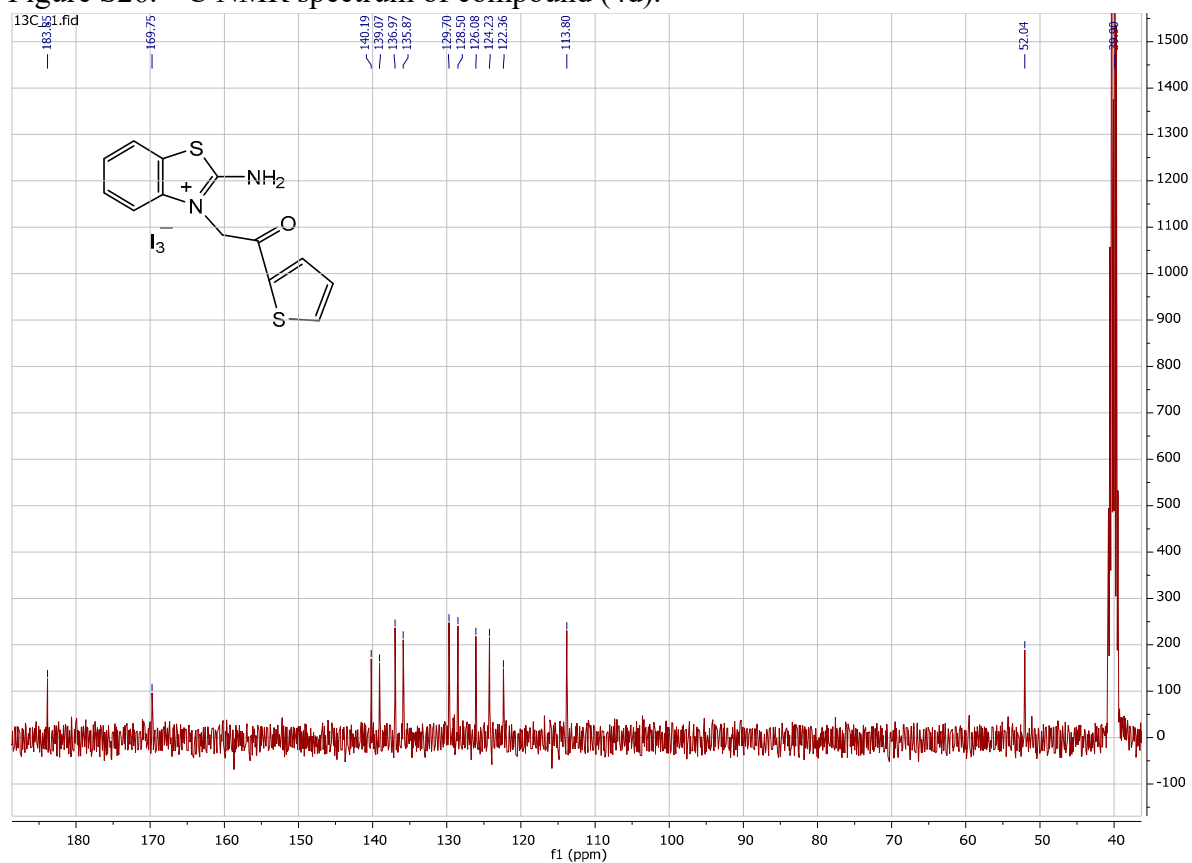

Figure S27.  $^1\text{H}$  NMR spectrum of compound (4e).

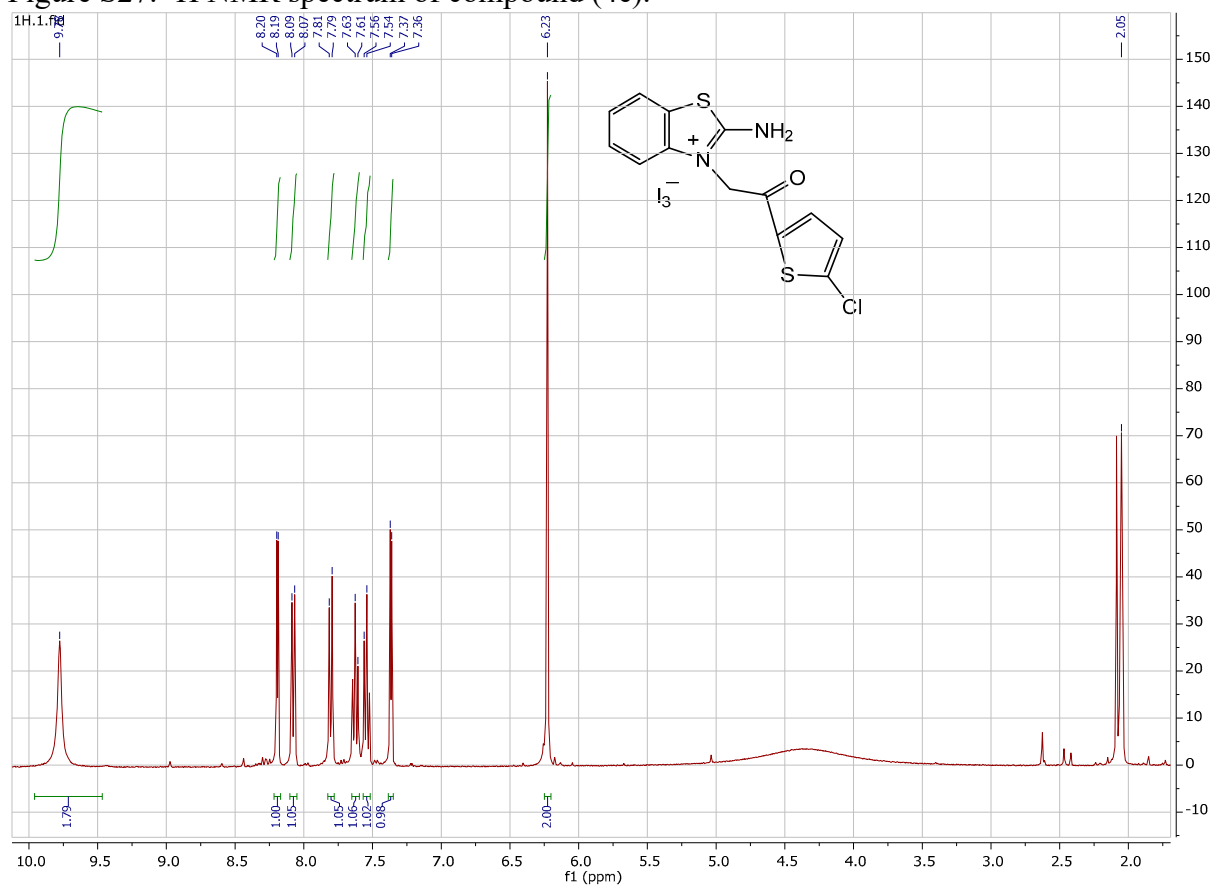

Figure S28.  $^{13}\text{C}$  NMR spectrum of compound (4e).

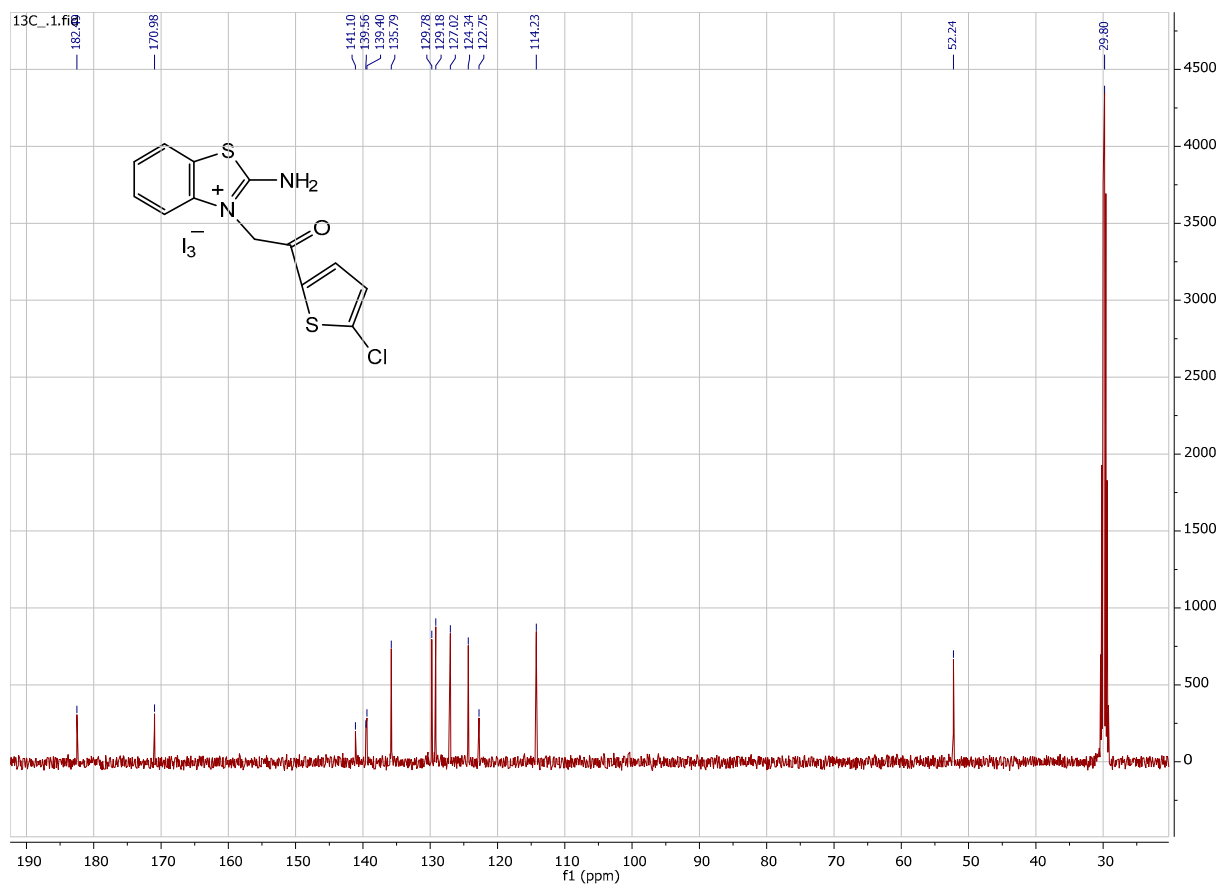

Figure S29. <sup>1</sup>H NMR spectrum of compound (6a).

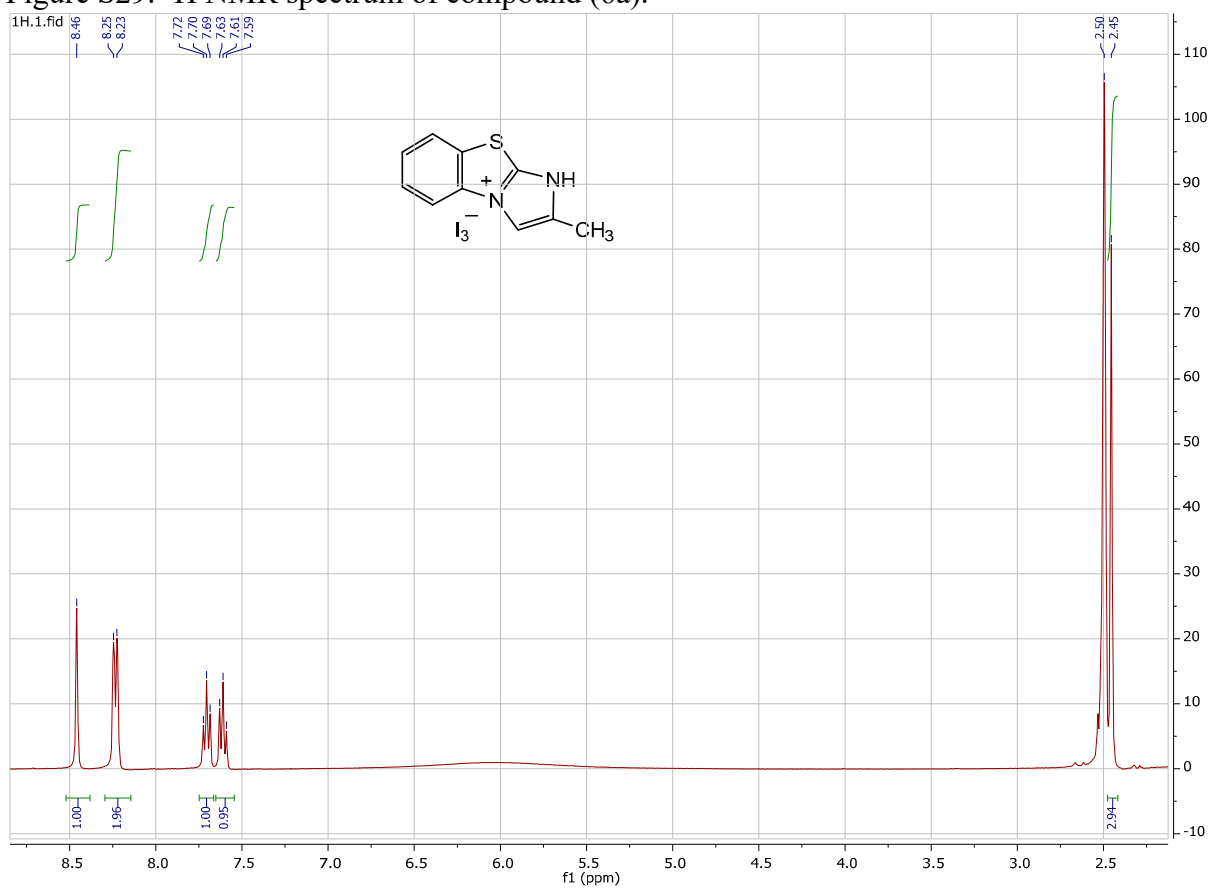

Figure S30. <sup>13</sup>C NMR spectrum of compound (6a).

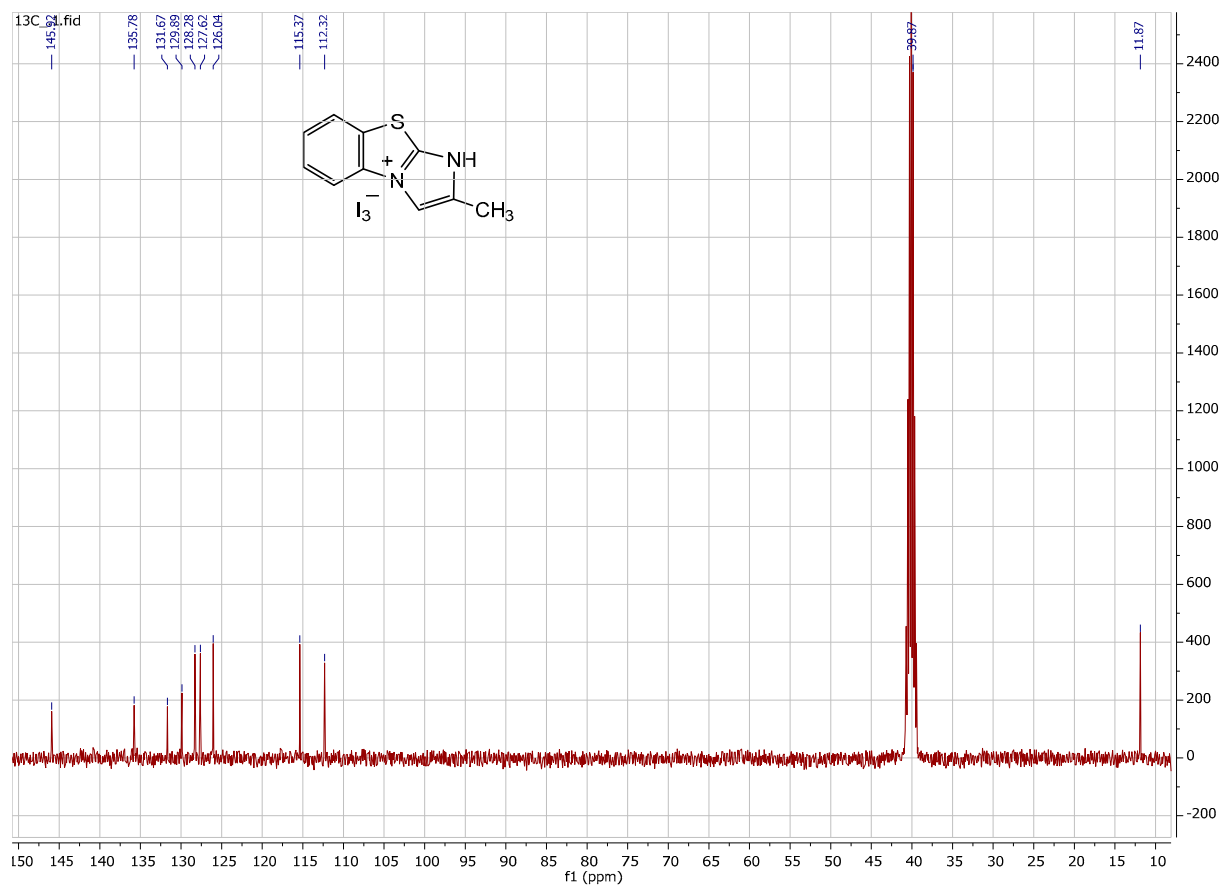

Figure S31. <sup>1</sup>H NMR spectrum of compound (6b).

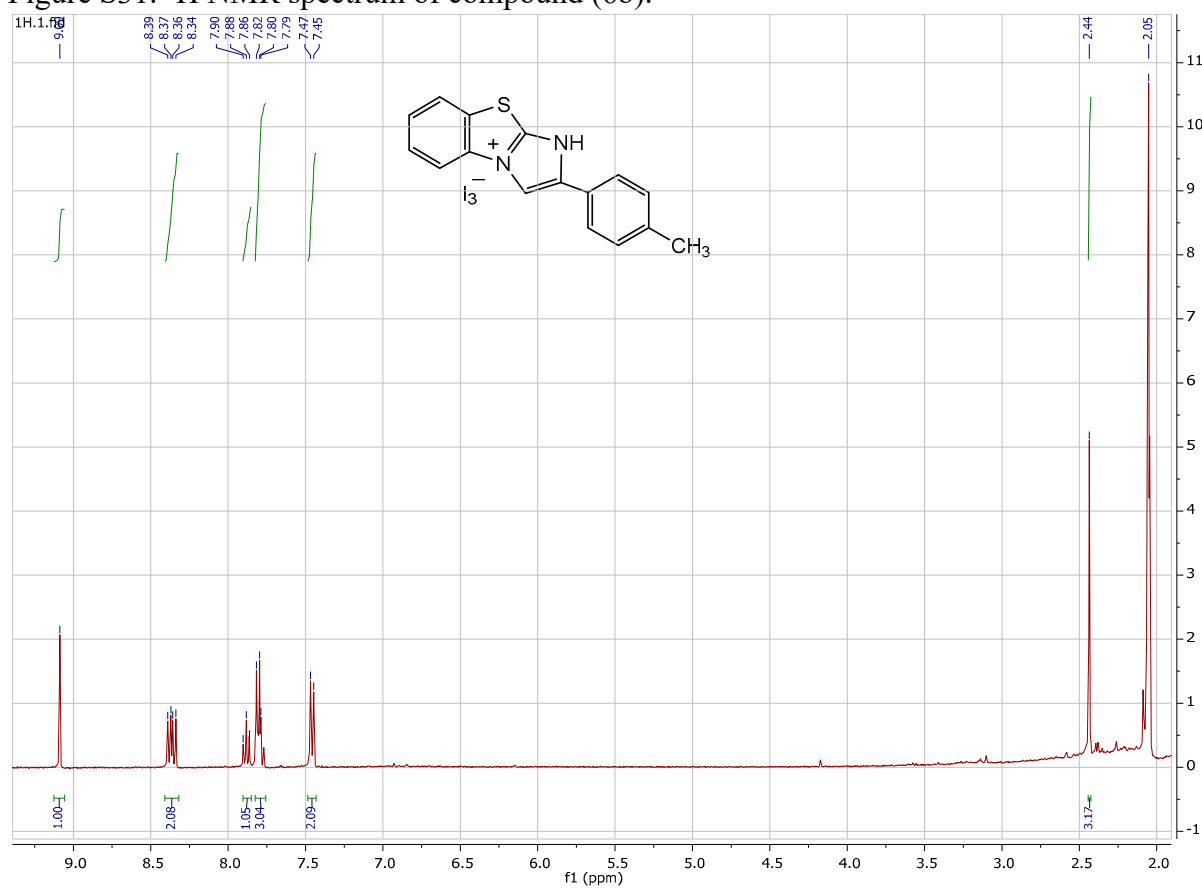

Figure S32. <sup>13</sup>C NMR spectrum of compound (6b).

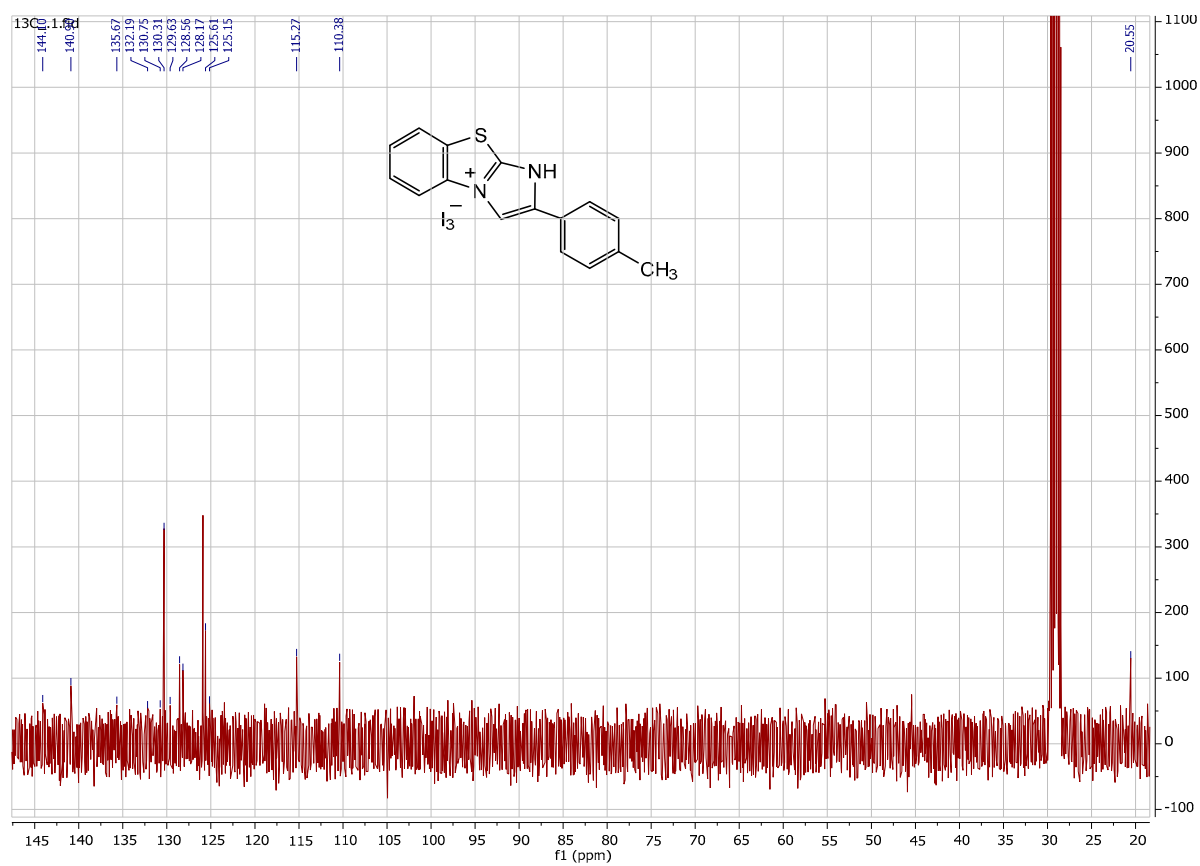

Figure S33. <sup>1</sup>H NMR spectrum of compound (6c).

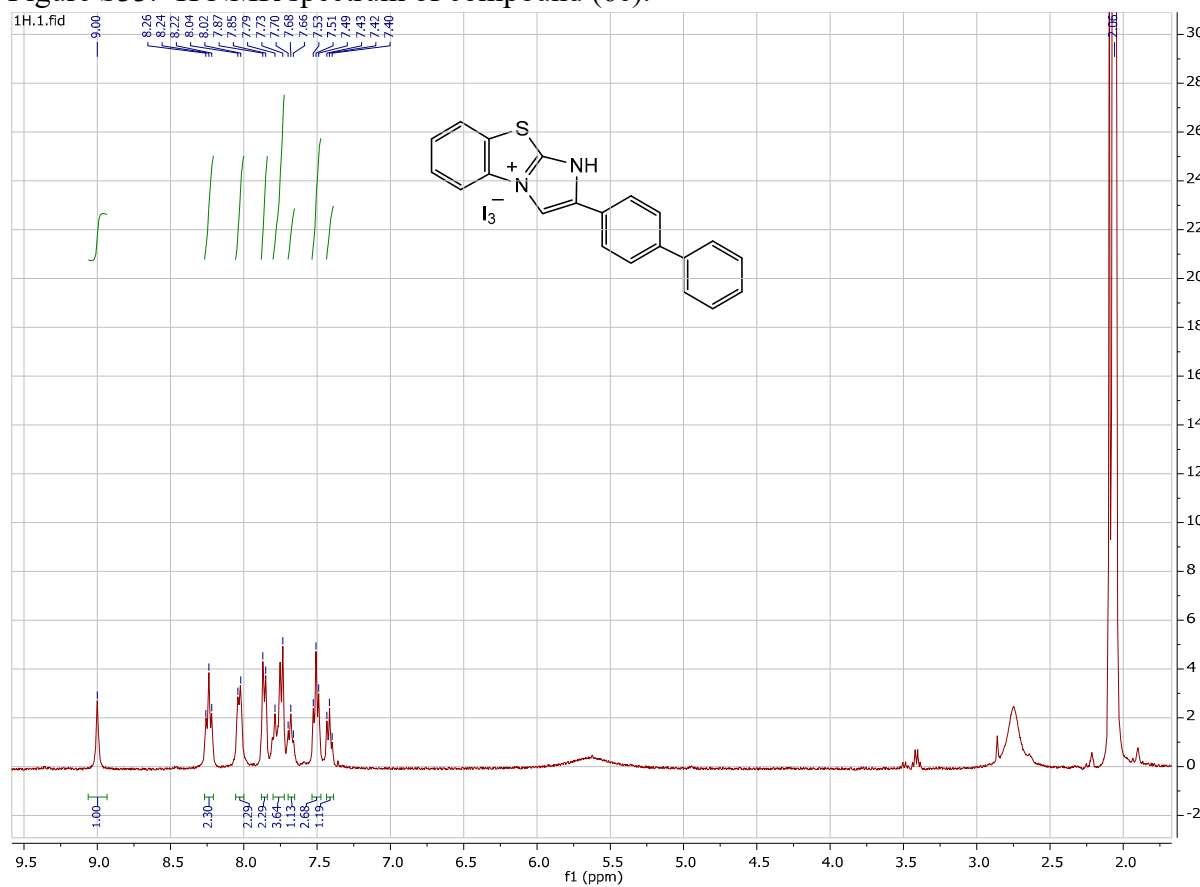

Figure S34. <sup>13</sup>C NMR spectrum of compound (6c).

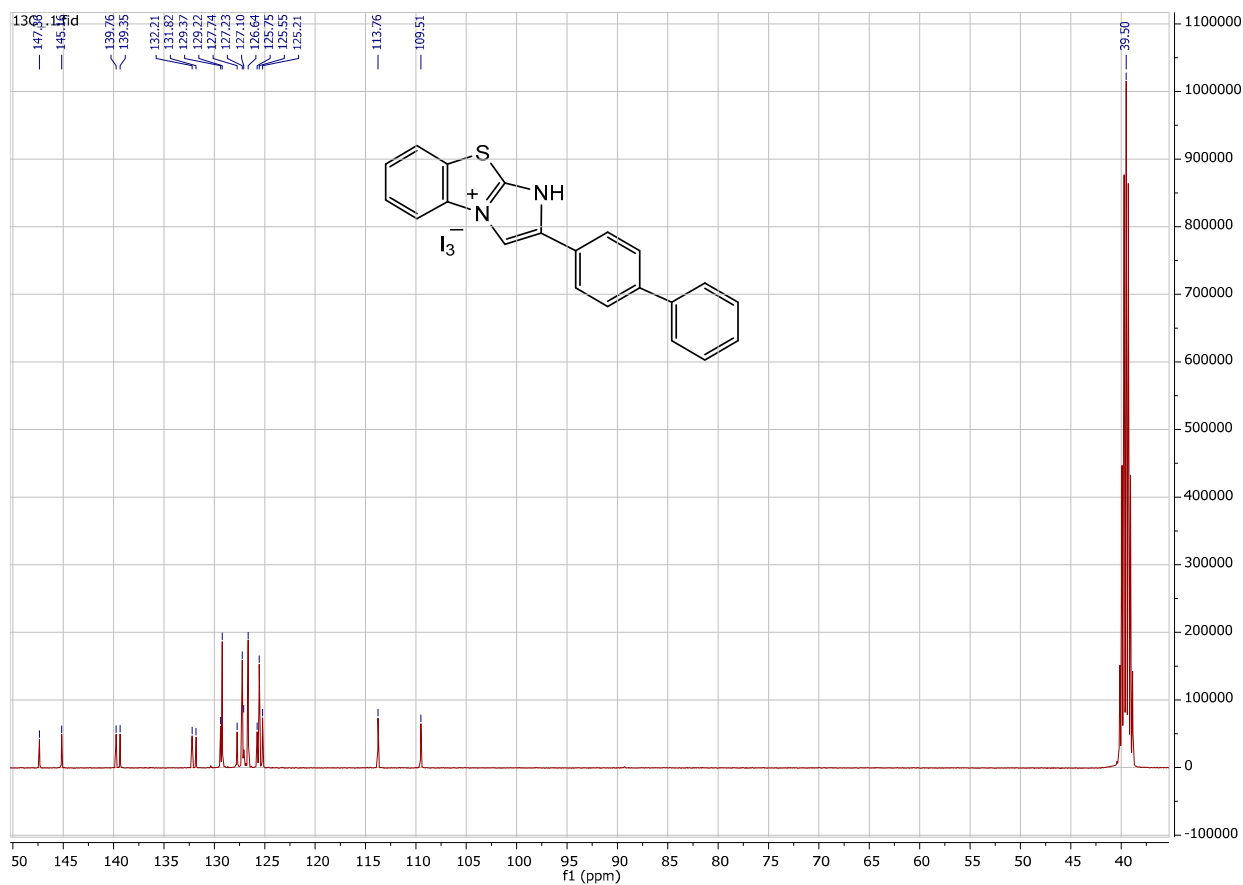

Figure S35. <sup>1</sup>H NMR spectrum of compound (6d).

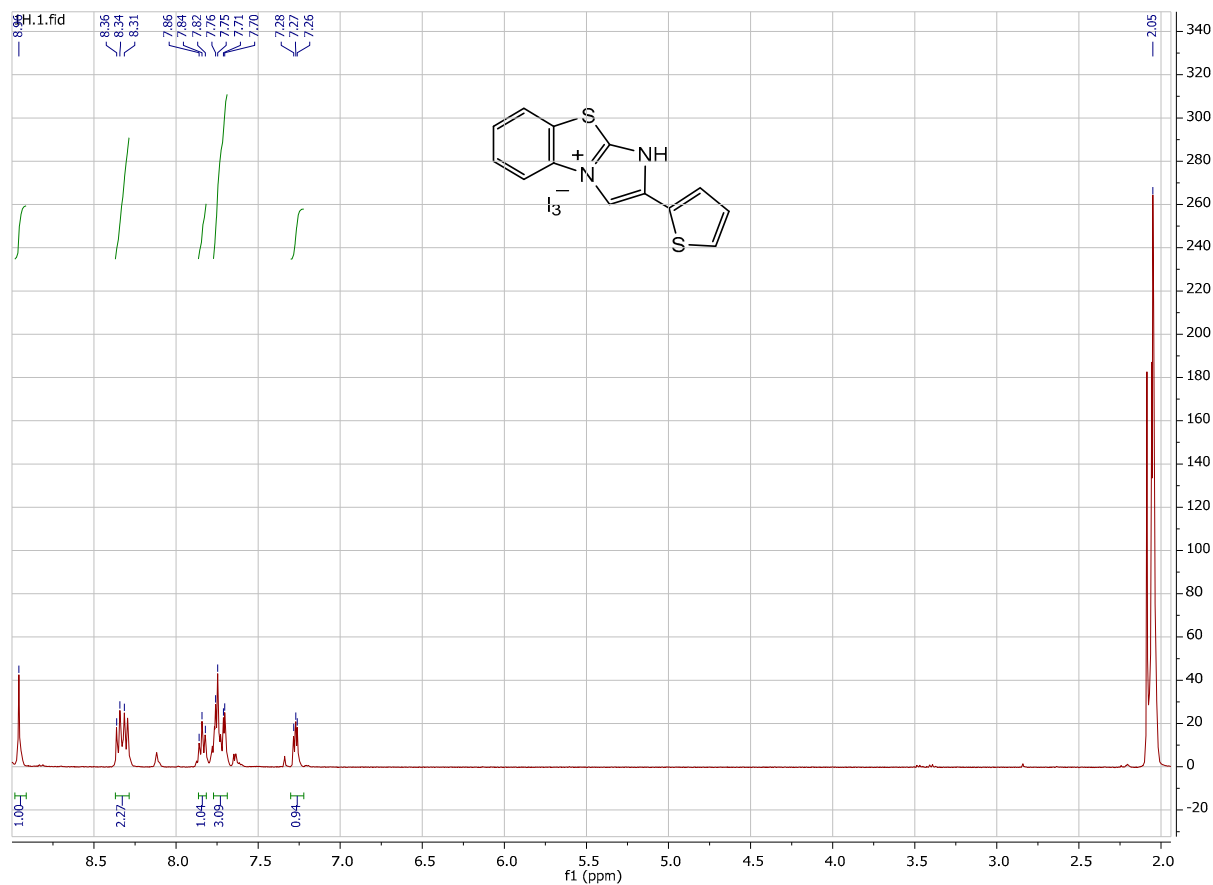

Figure S36. <sup>13</sup>C NMR spectrum of compound (6d).

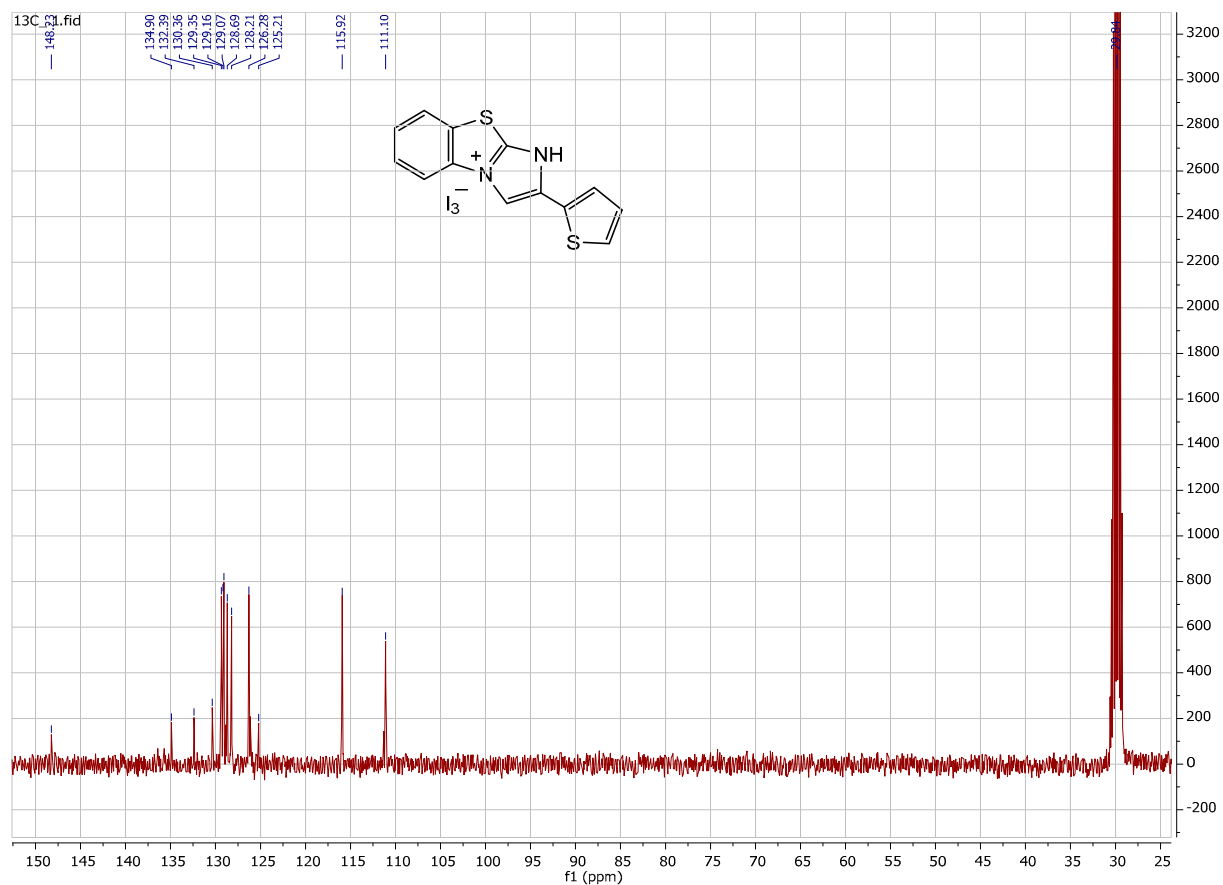

Figure S37. <sup>1</sup>H NMR spectrum of compound (6e).

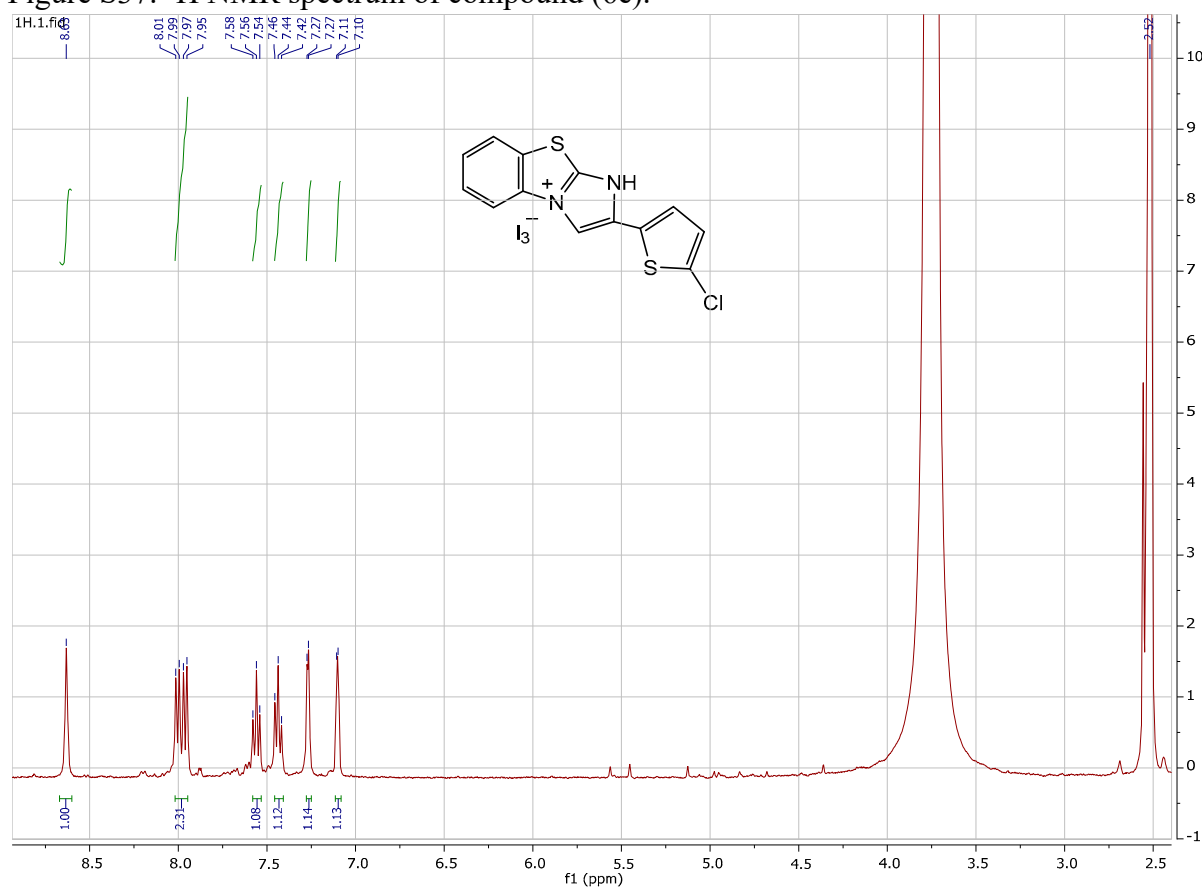

Figure S38. <sup>13</sup>C NMR spectrum of compound (6e).

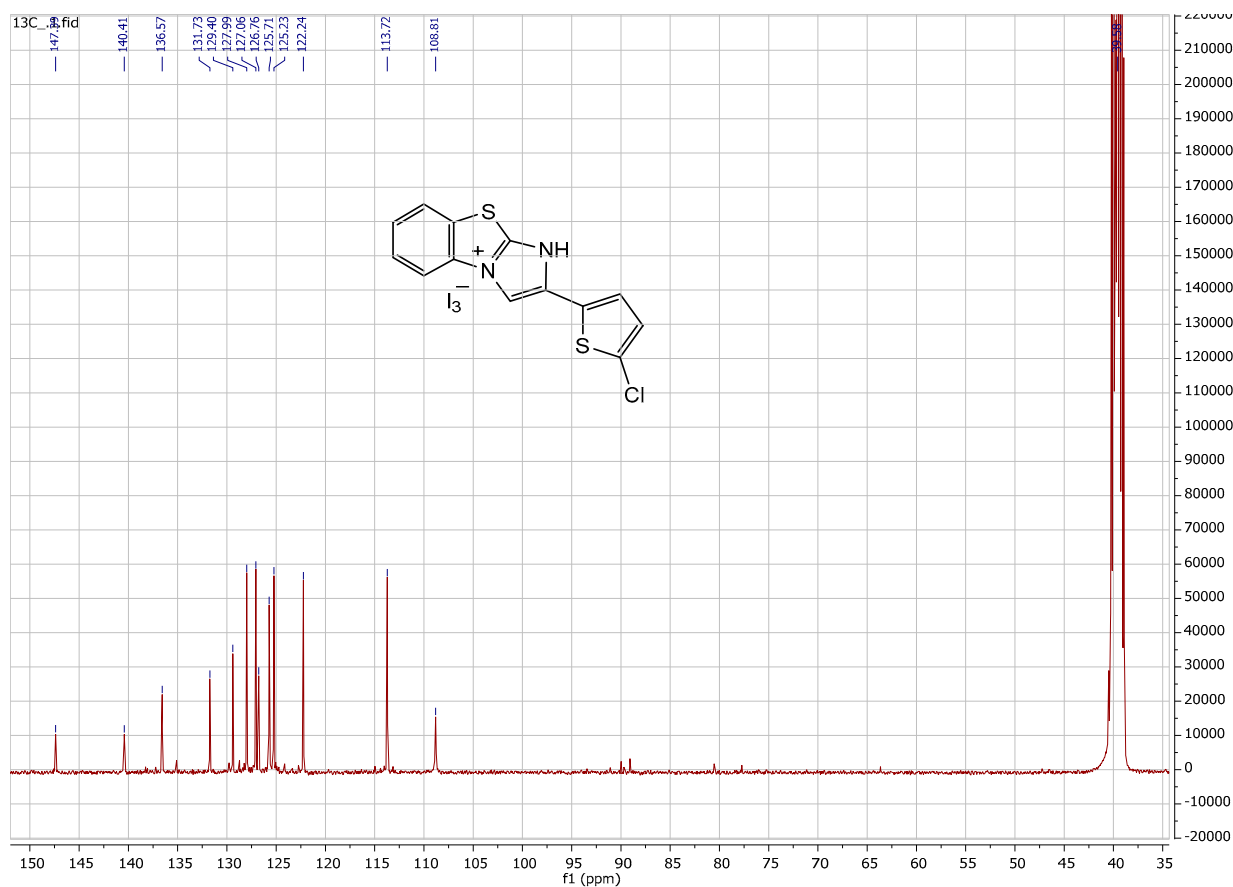

Figure S39. <sup>1</sup>H NMR spectrum of compound (6f).

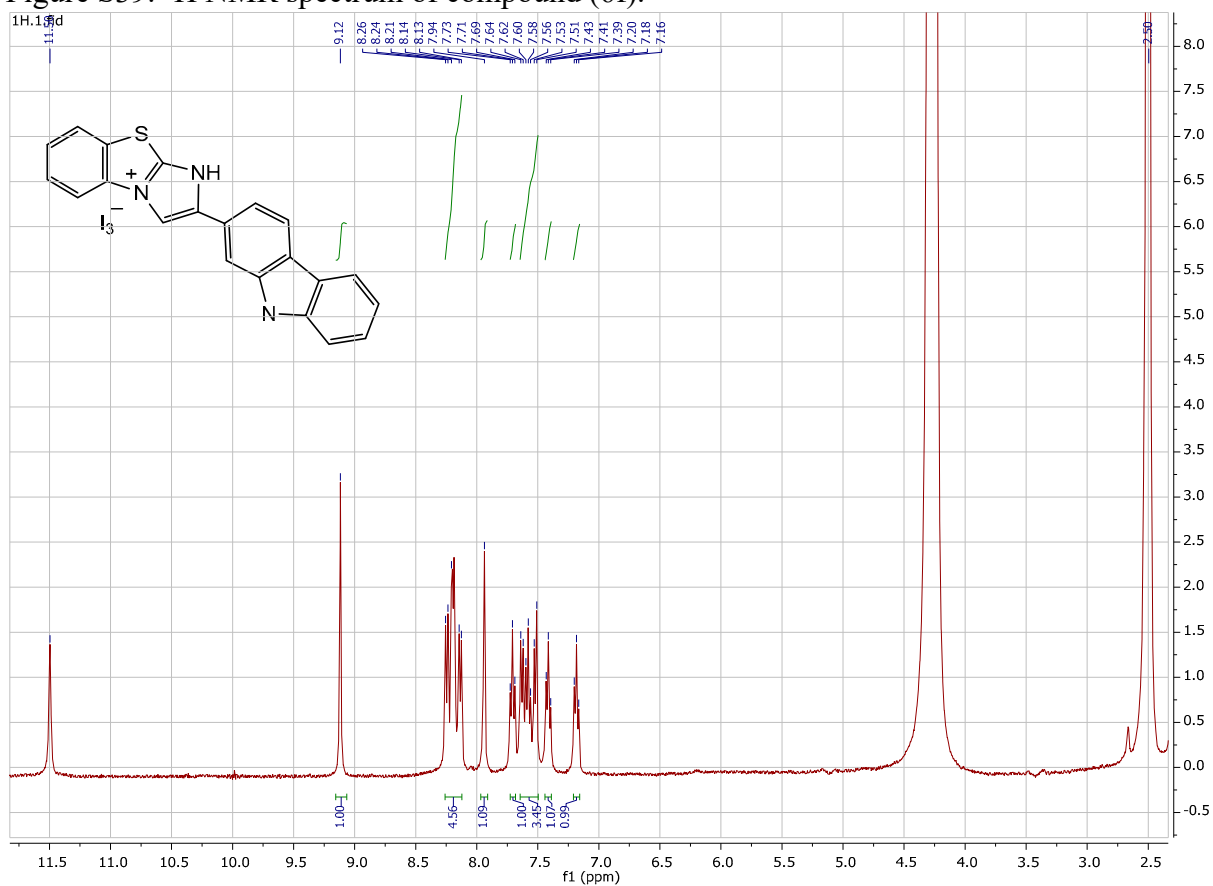

Figure S40. <sup>13</sup>C NMR spectrum of compound (6f).

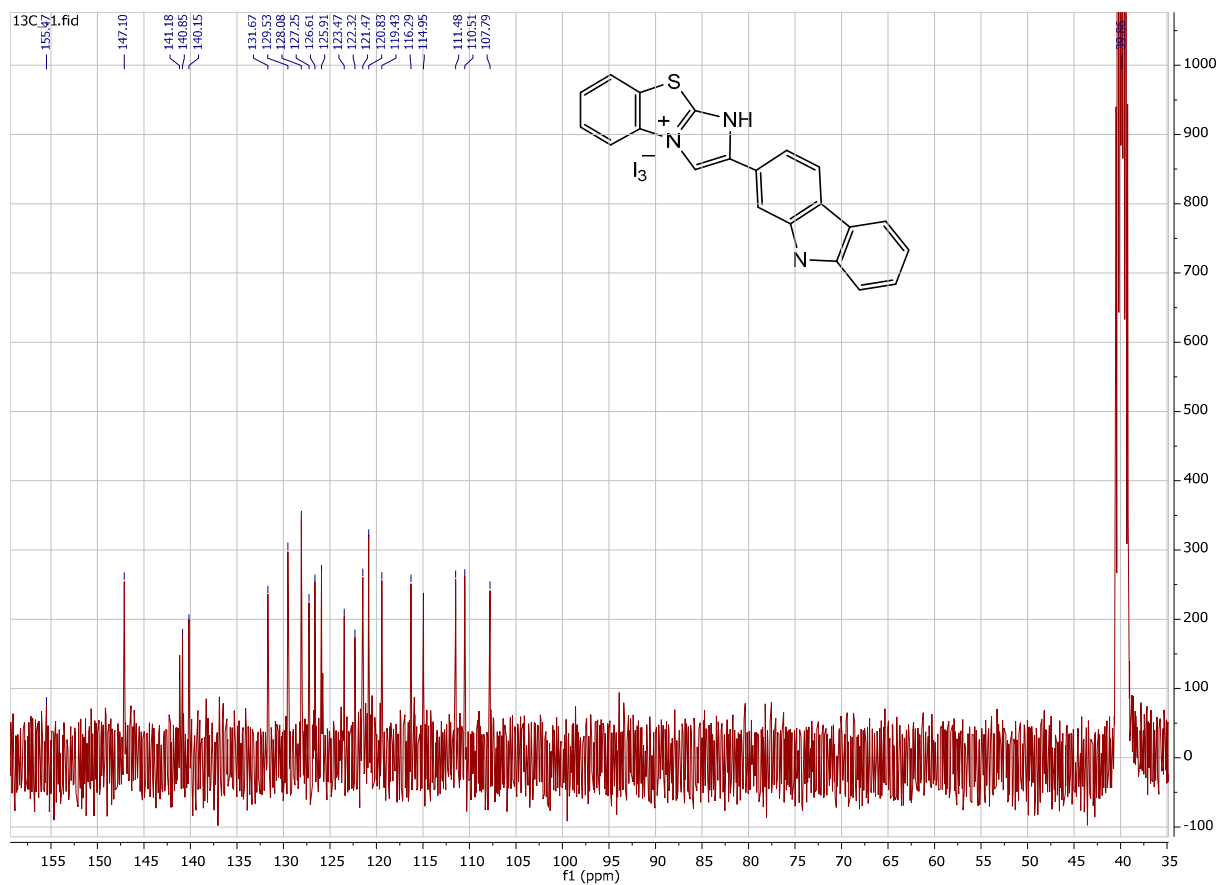

Supplement: s1 [file s1]
